# Supplementary material
Source: publisher figshare collection journal article supplement (https://gsapubs.figshare.com/articles/dataset/_/13377182)
Supplement: Supplementary file 1 [file 1]

Table S1 (geochemical data)

| Sample             | Lat    | Long    | Structure | on<br>bottom<br>mbsl | off<br>bottom<br>mbsl | Age (Ma) ±<br>2σ | Chemical<br>Group | Analyzed<br>Material | Trace<br>Elements<br>Method | LOI<br>g/100g        |
|--------------------|--------|---------|-----------|----------------------|-----------------------|------------------|-------------------|----------------------|-----------------------------|----------------------|
| SO255-DR32-1       | -34.25 | 179.51  | cliff     | 2990                 | 2537                  |                  | depleted KR       | whole rock           | ICP-MS                      | 1.41                 |
| SO255-DR32-8       | -34.25 | 179.51  | cliff     | 2990                 | 2537                  |                  | depleted KR       | whole rock           | ICP-MS                      | <a href="#">1.93</a> |
| SO255-DR47-1       | -29.78 | -176.44 | step      | 8106                 | 7737                  |                  | depleted KR       | whole rock           | ICP-MS                      | 1.30                 |
| SO255-DR47-2       | -29.78 | -176.44 | step      | 8106                 | 7737                  |                  | depleted KR       | whole rock           | ICP-MS                      | 5.29                 |
| SO255-DR47-3       | -29.78 | -176.44 | step      | 8106                 | 7737                  |                  | depleted KR       | whole rock           | ICP-MS                      | 6.01                 |
| SO255-DR52-1       | -29.87 | -178.33 | step      | 1608                 | 1100                  |                  | depleted KR       | whole rock           | ICP-MS                      | 8.62                 |
| SO255-DR62-1       | -28.44 | -177.66 | step      | 1512                 | 1161                  |                  | depleted KR       | volcanic glass       | LA-ICP-MS                   | n.d.                 |
| SO255-DR62-5       | -28.44 | -177.66 | step      | 1512                 | 1161                  |                  | depleted KR       | whole rock           | ICP-MS                      | 0.97                 |
| SO255-DR62-6       | -28.44 | -177.66 | step      | 1512                 | 1161                  |                  | depleted KR       | whole rock           | ICP-MS                      | 0.00                 |
| SO255-DR63-1       | -28.12 | -177.73 | smt       | 2204                 | 1770                  |                  | depleted KR       | whole rock           | ICP-MS                      | 0.83                 |
| SO255-DR63-2       | -28.12 | -177.73 | smt       | 2204                 | 1770                  |                  | depleted KR       | whole rock           | ICP-MS                      | 0.90                 |
| SO255-DR63-3       | -28.12 | -177.73 | smt       | 2204                 | 1770                  |                  | depleted KR       | whole rock           | ICP-MS                      | 0.98                 |
| SO255-DR63-4       | -28.12 | -177.73 | smt       | 2204                 | 1770                  |                  | depleted KR       | whole rock           | ICP-MS                      | 0.80                 |
| SO255-DR63-5       | -28.12 | -177.73 | smt       | 2204                 | 1770                  |                  | depleted KR       | whole rock           | ICP-MS                      | 0.74                 |
| SO255-DR125-1      | -31.03 | -178.74 | smt       | 883                  | 504                   |                  | depleted KR       | whole rock           | ICP-MS                      | 0.00                 |
| SO255-DR125-6      | -31.03 | -178.74 | smt       | 883                  | 504                   |                  | depleted KR       | whole rock           | ICP-MS                      | 0.15                 |
| SO255-DR128-1      | -31.78 | -179.04 | smt       | 2314                 | 1933                  |                  | depleted KR       | whole rock           | ICP-MS                      | 0.04                 |
| SO255-DR128-5      | -31.78 | -179.04 | smt       | 2314                 | 1933                  |                  | depleted KR       | whole rock           | ICP-MS                      | 0.79                 |
| SO255-DR129-1      | -31.80 | -179.04 | smt       | 1716                 | 1325                  |                  | depleted KR       | whole rock           | ICP-MS                      | 0.00                 |
| SO255-DR129-10     | -31.80 | -179.04 | smt       | 1716                 | 1325                  |                  | depleted KR       | volcanic glass       | LA-ICP-MS                   | n.d.                 |
| SO255-DR129-12     | -31.80 | -179.04 | smt       | 1716                 | 1325                  |                  | depleted KR       | whole rock           | ICP-MS                      | 0.00                 |
| SO255-DR129-20     | -31.80 | -179.04 | smt       | 1716                 | 1325                  |                  | depleted KR       | whole rock           | ICP-MS                      | 0.16                 |
| SO255-DR130-1      | -31.68 | -179.02 | smt       | 2395                 | 2091                  |                  | depleted KR       | volcanic glass       | LA-ICP-MS                   | n.d.                 |
| SO255-DR130-2      | -31.68 | -179.02 | smt       | 2395                 | 2091                  |                  | depleted KR       | volcanic glass       | LA-ICP-MS                   | n.d.                 |
| SO255-DR130-3      | -31.68 | -179.02 | smt       | 2395                 | 2091                  |                  | depleted KR       | volcanic glass       | LA-ICP-MS                   | n.d.                 |
| SO255-DR130-4      | -31.68 | -179.02 | smt       | 2395                 | 2091                  |                  | depleted KR       | volcanic glass       | LA-ICP-MS                   | n.d.                 |
| SO255-DR131-1      | -31.86 | -179.06 | basin     | 2040                 | 1730                  |                  | depleted KR       | whole rock           | ICP-MS                      | 0.53                 |
| SO255-DR131-2      | -31.86 | -179.06 | basin     | 2040                 | 1730                  |                  | depleted KR       | whole rock           | ICP-MS                      | 0.48                 |
| SO255-DR131-3      | -31.86 | -179.06 | basin     | 2040                 | 1730                  |                  | depleted KR       | whole rock           | ICP-MS                      | 0.47                 |
| SO255-DR132-2      | -31.98 | -179.11 | ridge     | 1010                 | 1635                  |                  | depleted KR       | volcanic glass       | LA-ICP-MS                   | n.d.                 |
| SO255-DR132-4      | -31.98 | -179.11 | ridge     | 1010                 | 1635                  |                  | depleted KR       | volcanic glass       | LA-ICP-MS                   | n.d.                 |
| SO255-DR132-5      | -31.98 | -179.11 | ridge     | 1010                 | 1635                  |                  | depleted KR       | volcanic glass       | LA-ICP-MS                   | n.d.                 |
| SO255-DR133-1      | -32.09 | -179.26 | smt       | 2230                 | 1830                  |                  | depleted KR       | whole rock           | ICP-MS                      | 0.21                 |
| SO255-DR133-4      | -32.09 | -179.26 | smt       | 2230                 | 1830                  |                  | depleted KR       | whole rock           | ICP-MS                      | 0.13                 |
| SO255-DR134-1      | -32.30 | -179.29 | ridge     | 2954                 | 2753                  |                  | depleted KR       | whole rock           | ICP-MS                      | 0.62                 |
| SO255-DR134-6      | -32.30 | -179.29 | ridge     | 2954                 | 2753                  |                  | depleted KR       | whole rock           | ICP-MS                      | 0.00                 |
| SO255-DR135-1      | -32.33 | -179.29 | ridge     | 2275                 | 1961                  |                  | depleted KR       | volcanic glass       | LA-ICP-MS                   | n.d.                 |
| SO255-DR135-4      | -32.33 | -179.29 | ridge     | 2275                 | 1961                  |                  | depleted KR       | volcanic glass       | LA-ICP-MS                   | n.d.                 |
| SO255-DR135-6      | -32.33 | -179.29 | ridge     | 2275                 | 1961                  |                  | depleted KR       | volcanic glass       | LA-ICP-MS                   | n.d.                 |
| SO255-DR135-7      | -32.33 | -179.29 | ridge     | 2275                 | 1961                  |                  | depleted KR       | volcanic glass       | LA-ICP-MS                   | n.d.                 |
| SO255-DR135-10     | -32.33 | -179.29 | ridge     | 2275                 | 1961                  |                  | depleted KR       | volcanic glass       | LA-ICP-MS                   | n.d.                 |
| SO255-DR176-1      | -33.87 | 179.82  | smt       | 2147                 | 1896                  |                  | depleted KR       | volcanic glass       | LA-ICP-MS                   | n.d.                 |
| SO255-DR176-2      | -33.87 | 179.82  | smt       | 2147                 | 1896                  |                  | depleted KR       | volcanic glass       | LA-ICP-MS                   | n.d.                 |
| SO255-DR176-2      | -33.87 | 179.82  | smt       | 2147                 | 1896                  |                  | depleted KR       | whole rock           | ICP-MS                      | 0.05                 |
| SO255-DR176-3      | -33.87 | 179.82  | smt       | 2147                 | 1896                  |                  | depleted KR       | whole rock           | ICP-MS                      | 0.23                 |
| SO255-DR176-4      | -33.87 | 179.82  | smt       | 2147                 | 1896                  |                  | depleted KR       | whole rock           | ICP-MS                      | 0.30                 |
| SO255-DR30-2       | -34.55 | 179.48  | cliff     | 2235                 | 1720                  |                  | enriched KR       | whole rock           | ICP-MS                      | <a href="#">1.93</a> |
| SO255-DR30-4       | -34.55 | 179.48  | cliff     | 2235                 | 1720                  | 4.41 ± 0.35**    | enriched KR       | whole rock           | ICP-MS                      | <a href="#">0.78</a> |
| SO255-DR31-1       | -34.49 | 179.48  | cliff     | 2670                 | 2330                  |                  | enriched KR       | whole rock           | ICP-MS                      | <a href="#">1.39</a> |
| SO255-DR31-3       | -34.49 | 179.48  | cliff     | 2670                 | 2330                  |                  | enriched KR       | whole rock           | ICP-MS                      | <a href="#">0.75</a> |
| SO255-DR35-2       | -34.35 | 179.61  | cliff     | 1739                 | 1459                  |                  | enriched KR       | whole rock           | ICP-MS                      | 2.06                 |
| SO255-DR35-4       | -34.35 | 179.61  | cliff     | 1739                 | 1459                  |                  | enriched KR       | whole rock           | ICP-MS                      | 2.12                 |
| SO255-DR35-6       | -34.35 | 179.61  | cliff     | 1739                 | 1459                  |                  | enriched KR       | whole rock           | ICP-MS                      | <a href="#">2.02</a> |
| SO255-DR35-9       | -34.35 | 179.61  | cliff     | 1739                 | 1459                  |                  | enriched KR       | whole rock           | ICP-MS                      | <a href="#">1.28</a> |
| SO255-DR54-2       | -29.83 | -178.29 | step      | 1477                 | 1165                  |                  | enriched KR       | whole rock           | ICP-MS                      | 1.06                 |
| SO255-DR54-3Clast1 | -29.83 | -178.29 | step      | 1477                 | 1165                  |                  | enriched KR       | whole rock           | ICP-MS                      | 3.38                 |
| SO255-DR54-3Clast2 | -29.83 | -178.29 | step      | 1477                 | 1165                  |                  | enriched KR       | whole rock           | ICP-MS                      | 3.50                 |
| SO255-DR126-1      | -31.61 | -178.87 | scarp     | 1217                 | 872                   |                  | enriched KR       | whole rock           | ICP-MS                      | 0.65                 |
| SO255-DR126-4      | -31.61 | -178.87 | scarp     | 1217                 | 872                   |                  | enriched KR       | whole rock           | ICP-MS                      | 1.90                 |
| SO255-DR136-1      | -32.36 | -179.22 | ridge     | 1180                 | 972                   |                  | enriched KR       | whole rock           | ICP-MS                      | 2.99                 |
| SO255-DR136-3      | -32.36 | -179.22 | ridge     | 1180                 | 972                   |                  | enriched KR       | whole rock           | ICP-MS                      | 3.04                 |
| SO255-DR137-1      | -32.78 | -179.51 | ridge     | 2481                 | 2052                  |                  | enriched KR       | whole rock           | ICP-MS                      | 7.27                 |
| SO255-DR137-2      | -32.78 | -179.51 | ridge     | 2481                 | 2052                  |                  | enriched KR       | whole rock           | ICP-MS                      | 6.26                 |
| SO255-DR138-1      | -32.83 | -179.51 | ridge     | 1888                 | 1473                  |                  | enriched KR       | whole rock           | ICP-MS                      | 2.39                 |
| SO255-DR138-9      | -32.83 | -179.51 | ridge     | 1888                 | 1473                  |                  | enriched KR       | whole rock           | ICP-MS                      | 3.79                 |
| SO255-DR139-2      | -32.93 | -179.53 | ridge     | 995                  | 633                   | 4.6 ± 1.6**      | enriched KR       | whole rock           | ICP-MS                      | <a href="#">0.94</a> |
| SO255-DR139-8      | -32.93 | -179.53 | ridge     | 995                  | 633                   |                  | enriched KR       | whole rock           | ICP-MS                      | <a href="#">1.48</a> |
| SO255-DR139-12     | -32.93 | -179.53 | ridge     | 995                  | 633                   |                  | enriched KR       | whole rock           | ICP-MS                      | <a href="#">2.25</a> |
| SO255-DR139-15     | -32.93 | -179.53 | ridge     | 995                  | 633                   |                  | enriched KR       | whole rock           | ICP-MS                      | 1.16                 |
| SO255-DR139-16     | -32.93 | -179.53 | ridge     | 995                  | 633                   |                  | enriched KR       | whole rock           | ICP-MS                      | 5.16                 |
| SO255-DR139-17     | -32.93 | -179.53 | ridge     | 995                  | 633                   |                  | enriched KR       | whole rock           | ICP-MS                      | 2.56                 |
| SO255-DR178-2      | -34.17 | 179.76  | smt       | 1200                 | 838                   |                  | enriched KR       | whole rock           | ICP-MS                      | 0.78                 |
| SO255-DR178-3      | -34.17 | 179.76  | smt       | 1200                 | 838                   |                  | enriched KR       | whole rock           | ICP-MS                      | 5.70                 |
| SO255-DR179-1      | -34.22 | 179.71  | ridge     | 1106                 | 738                   |                  | enriched KR       | whole rock           | ICP-MS                      | 2.49                 |
| SO255-DR179-5      | -34.22 | 179.71  | ridge     | 1106                 | 738                   | 4.8 ± 1.2**      | enriched KR       | whole rock           | ICP-MS                      | 1.50                 |
| SO255-DR179-8      | -34.22 | 179.71  | ridge     | 1106                 | 738                   |                  | enriched KR       | whole rock           | ICP-MS                      | 0.51                 |
| SO255-DR179-12     | -34.22 | 179.71  | ridge     | 1106                 | 738                   |                  | enriched KR       | whole rock           | ICP-MS                      | 0.94                 |
| SO255-DR179-14     | -34.22 | 179.71  | ridge     | 1106                 | 738                   |                  | enriched KR       | whole rock           | ICP-MS                      | 0.75                 |
| SO255-DR179-15     | -34.22 | 179.71  | ridge     | 1106                 | 738                   |                  | enriched KR       | whole rock           | ICP-MS                      | 2.25                 |
| SO255-DR179-16     | -34.22 | 179.71  | ridge     | 1106                 | 738                   |                  | enriched KR       | whole rock           | ICP-MS                      | 0.61                 |
| SO255-DR179-17     | -34.22 | 179.71  | ridge     | 1106                 | 738                   |                  | enriched KR       | whole rock           | ICP-MS                      | 0.38                 |
| SO255-DR76-1       | -28.02 | -179.77 | smt       | 1018                 | 877                   |                  | depleted CR       | whole rock           | ICP-MS                      | 1.87                 |

| Sample                 | Lat    | Long    | Structure | on<br>bottom<br>mbsl | off<br>bottom<br>mbsl | Age (Ma) ±<br>2σ | Chemical<br>Group | Analyzed<br>Material | Trace<br>Elements<br>Method | LOI<br>g/100g |
|------------------------|--------|---------|-----------|----------------------|-----------------------|------------------|-------------------|----------------------|-----------------------------|---------------|
| SO255-DR76-2           | -28.02 | -179.77 | smt       | 1018                 | 877                   | 16.68 ± 0.10*    | depleted CR       | whole rock           | ICP-MS                      | 0.72          |
| SO255-DR76-3           | -28.02 | -179.77 | smt       | 1018                 | 877                   |                  | depleted CR       | whole rock           | XRF                         | 2.64          |
| SO255-DR78-1A          | -28.50 | -179.60 | smt       | 1372                 | 1002                  |                  | depleted CR       | whole rock           | ICP-MS                      | 4.36          |
| SO255-DR78-1BClastl    | -28.50 | -179.60 | smt       | 1372                 | 1002                  |                  | depleted CR       | whole rock           | ICP-MS                      | 9.21          |
| SO255-DR78-1BClastll   | -28.50 | -179.60 | smt       | 1372                 | 1002                  |                  | depleted CR       | whole rock           | XRF                         | 9.63          |
| TAN1611-DR017A         | -32.81 | 178.70  | smt       | 1160                 | 1130                  |                  | depleted CR       | whole rock           | ICP-MS                      | 3.75          |
| TAN1611-DR017B         | -32.81 | 178.70  | smt       | 1160                 | 1130                  |                  | depleted CR       | whole rock           | XRF                         | 4.05          |
| P49127*                | -35.06 | 177.49  | ridge     | 832                  | 832                   |                  | depleted CR       | whole rock           | ICP-MS                      | 2.94          |
| SO255-DR4-1            | -34.00 | 178.28  | ridge     | 1811                 | 1298                  |                  | enriched CR       | whole rock           | ICP-MS                      | 1.71          |
| SO255-DR4-3            | -34.00 | 178.28  | ridge     | 1811                 | 1298                  |                  | enriched CR       | whole rock           | XRF                         | 2.38          |
| SO255-DR4-12           | -34.00 | 178.28  | ridge     | 1811                 | 1298                  |                  | enriched CR       | whole rock           | NP-ICP-MS                   | 2.15          |
| SO255-DR4-13           | -34.00 | 178.28  | ridge     | 1811                 | 1298                  |                  | enriched CR       | whole rock           | NP-ICP-MS                   | 2.21          |
| SO255-DR5-1            | -33.94 | 178.24  | ridge     | 2280                 | 1875                  |                  | enriched CR       | whole rock           | ICP-MS                      | 0.57          |
| SO255-DR5-4            | -33.94 | 178.24  | ridge     | 2280                 | 1875                  |                  | enriched CR       | whole rock           | XRF                         | 11.7          |
| SO255-DR5-6            | -33.94 | 178.24  | ridge     | 2280                 | 1875                  |                  | enriched CR       | whole rock           | XRF                         | 1.85          |
| SO255-DR85-1           | -30.22 | 179.29  | smt       | 1200                 | 755                   |                  | enriched CR       | whole rock           | ICP-MS                      | 2.36          |
| SO255-DR85-2           | -30.22 | 179.29  | smt       | 1200                 | 755                   |                  | enriched CR       | whole rock           | ICP-MS                      | 7.44          |
| SO255-DR89-1           | -29.59 | -179.77 | smt       | 1013                 | 844                   |                  | enriched CR       | whole rock           | ICP-MS                      | 3.81          |
| SO255-DR89-3           | -29.59 | -179.77 | smt       | 1013                 | 844                   |                  | enriched CR       | whole rock           | XRF                         | 8.16          |
| SO255-DR89-4           | -29.59 | -179.77 | smt       | 1013                 | 844                   |                  | enriched CR       | whole rock           | XRF                         | 5.93          |
| SO255-DR93-1           | -28.95 | -179.91 | ridge     | 1369                 | 995                   |                  | enriched CR       | whole rock           | ICP-MS                      | 0.52          |
| SO255-DR93-2           | -28.95 | -179.91 | ridge     | 1369                 | 995                   |                  | enriched CR       | whole rock           | XRF                         | 0.54          |
| SO255-DR97-1           | -28.59 | -179.69 | ridge     | 1210                 | 1013                  |                  | enriched CR       | whole rock           | ICP-MS                      | 1.70          |
| SO255-DR97-4           | -28.59 | -179.69 | ridge     | 1210                 | 1013                  |                  | enriched CR       | whole rock           | ICP-MS                      | 1.46          |
| SO255-DR97-8           | -28.59 | -179.69 | ridge     | 1210                 | 1013                  |                  | enriched CR       | whole rock           | XRF                         | 2.30          |
| SO255-DR98-1           | -28.57 | -179.67 | ridge     | 1034                 | 710                   |                  | enriched CR       | whole rock           | ICP-MS                      | 5.06          |
| SO255-DR98-2           | -28.57 | -179.67 | ridge     | 1034                 | 710                   |                  | enriched CR       | whole rock           | ICP-MS                      | 3.06          |
| SO255-DR98-3           | -28.57 | -179.67 | ridge     | 1034                 | 710                   |                  | enriched CR       | whole rock           | XRF                         | 14.80         |
| SO255-DR99-1           | -28.53 | -179.60 | smt       | 1217                 | 1097                  |                  | enriched CR       | whole rock           | ICP-MS                      | 8.38          |
| SO255-DR99-2           | -28.53 | -179.60 | smt       | 1217                 | 1097                  |                  | enriched CR       | whole rock           | XRF                         | 8.43          |
| SO255-DR99-3           | -28.53 | -179.60 | smt       | 1217                 | 1097                  |                  | enriched CR       | whole rock           | ICP-MS                      | 8.92          |
| SO255-DR101-1A         | -28.55 | -179.65 | smt       | 879                  | 708                   |                  | enriched CR       | whole rock           | ICP-MS                      | 7.45          |
| SO255-DR101-1B         | -28.55 | -179.65 | smt       | 879                  | 708                   |                  | enriched CR       | whole rock           | ICP-MS                      | 7.62          |
| SO255-DR101-2          | -28.55 | -179.65 | smt       | 879                  | 708                   |                  | enriched CR       | whole rock           | ICP-MS                      | 8.92          |
| SO255-DR155-1          | -31.88 | 179.37  | ridge     | 2540                 | 2120                  |                  | enriched CR       | whole rock           | ICP-MS                      | 8.37          |
| SO255-DR156-1AClastl   | -31.89 | 179.35  | ridge     | 2060                 | 1860                  |                  | enriched CR       | whole rock           | XRF                         | 2.45          |
| SO255-DR156-1AClastll  | -31.89 | 179.35  | ridge     | 2060                 | 1860                  |                  | enriched CR       | whole rock           | ICP-MS                      | 1.36          |
| SO255-DR156-1AClastlll | -31.89 | 179.35  | ridge     | 2060                 | 1860                  |                  | enriched CR       | whole rock           | ICP-MS                      | 1.81          |
| SO255-DR156-1BClastl   | -31.89 | 179.35  | ridge     | 2060                 | 1860                  |                  | enriched CR       | whole rock           | ICP-MS                      | 2.94          |
| SO255-DR156-1BClastll  | -31.89 | 179.35  | ridge     | 2060                 | 1860                  |                  | enriched CR       | whole rock           | XRF                         | 3.19          |
| SO255-DR158-1          | -31.91 | 179.33  | ridge     | 3390                 | 2980                  |                  | enriched CR       | whole rock           | ICP-MS                      | 3.04          |
| SO255-DR158-2          | -31.91 | 179.33  | ridge     | 3390                 | 2980                  |                  | enriched CR       | whole rock           | ICP-MS                      | 2.49          |
| SO255-DR159-1          | -31.96 | 179.26  | ridge     | 3439                 | 3101                  |                  | enriched CR       | whole rock           | ICP-MS                      | 3.36          |
| TAN1611-DR05A          | -31.82 | 179.42  | smt       | 1209                 | 1135                  |                  | enriched CR       | whole rock           | ICP-MS                      | 0.82          |
| TAN1611-DR06A          | -31.86 | 179.38  | smt       | 834                  | 760                   |                  | enriched CR       | whole rock           | ICP-MS                      | 2.17          |
| TAN1611-DR06B          | -31.86 | 179.38  | smt       | 834                  | 760                   |                  | enriched CR       | whole rock           | XRF                         | 2.84          |
| TAN1611-DR06C          | -31.86 | 179.38  | smt       | 834                  | 760                   |                  | enriched CR       | whole rock           | XRF                         | 2.30          |
| TAN1611-DR08B          | -32.10 | 179.18  | smt       | 1200                 | 1167                  |                  | enriched CR       | whole rock           | ICP-MS                      | 1.97          |
| SO255-DR2-1            | -33.56 | 177.89  | smt       | 2540                 | 2180                  |                  | intraplate CR     | whole rock           | ICP-MS                      | 2.82          |
| SO255-DR2-3            | -33.56 | 177.89  | smt       | 2540                 | 2180                  |                  | intraplate CR     | whole rock           | XRF                         | 4.36          |
| SO255-DR2-4            | -33.56 | 177.89  | smt       | 2540                 | 2180                  |                  | intraplate CR     | whole rock           | ICP-MS                      | 1.25          |
| SO255-DR3-1Clastl      | -33.56 | 177.93  | smt       | 2148                 | 1900                  |                  | intraplate CR     | whole rock           | ICP-MS                      | n.d.          |
| SO255-DR3-1Clastll     | -33.56 | 177.93  | smt       | 2148                 | 1900                  |                  | intraplate CR     | whole rock           | ICP-MS                      | n.d.          |
| SO255-DR3-2            | -33.56 | 177.93  | smt       | 2148                 | 1900                  |                  | intraplate CR     | whole rock           | ICP-MS                      | 2.24          |
| TAN1611-DR01A          | -31.42 | 179.44  | smt       | 1370                 | 1100                  |                  | intraplate CR     | whole rock           | ICP-MS                      | 0.59          |
| TAN1611-DR01B          | -31.42 | 179.44  | smt       | 1370                 | 1100                  |                  | intraplate CR     | whole rock           | XRF                         | 1.13          |
| TAN1611-DR01C          | -31.42 | 179.44  | smt       | 1370                 | 1100                  |                  | intraplate CR     | whole rock           | ICP-MS                      | 1.10          |
| TAN1611-DR02A          | -31.44 | 179.50  | smt       | 1452                 | 1249                  |                  | intraplate CR     | whole rock           | ICP-MS                      | 0.07          |
| TAN1611-DR02B          | -31.44 | 179.50  | smt       | 1452                 | 1249                  |                  | intraplate CR     | whole rock           | XRF                         | 0.19          |
| TAN1611-DR02C          | -31.44 | 179.50  | smt       | 1452                 | 1249                  |                  | intraplate CR     | whole rock           | XRF                         | 0.08          |

| Sample             | Li   | Sc   | V    | Cr   | Co   | Ni    | Cu   | Zn    | Ga   | Rb   | Sr   | Y    | Zr   | Nb    | Cs    | Ba   | La    | Ce   |
|--------------------|------|------|------|------|------|-------|------|-------|------|------|------|------|------|-------|-------|------|-------|------|
|                    | µg/g | µg/g | µg/g | µg/g | µg/g | µg/g  | µg/g | µg/g  | µg/g | µg/g | µg/g | µg/g | µg/g | µg/g  | µg/g  | µg/g | µg/g  | µg/g |
| SO255-DR32-1       | 11.9 | 42.8 | 351  | 136  | 35.5 | 32.6  | 140  | 77.5  | 16.6 | 18.2 | 320  | 19.3 | 60.1 | 0.868 | 0.722 | 302  | 6.32  | 15.0 |
| SO255-DR32-8       | 14.7 | 31.5 | 347  | 23.1 | 29.7 | 18.7  | 160  | 76.6  | 17.8 | 11.3 | 318  | 19.4 | 47.7 | 0.770 | 0.586 | 322  | 6.09  | 13.4 |
| SO255-DR47-1       | 4.11 | 51.0 | 550  | 51.6 | 42.5 | 24.2  | 259  | 105   | 18.4 | 10.2 | 350  | 23.9 | 57.8 | 0.715 | 0.227 | 270  | 5.85  | 13.3 |
| SO255-DR47-2       | 8.67 | 55.7 | 749  | 38.3 | 46.6 | 24.5  | 226  | 123   | 17.6 | 13.0 | 549  | 26.1 | 70.7 | 0.941 | 0.236 | 182  | 8.08  | 18.2 |
| SO255-DR47-3       | 4.27 | 34.4 | 401  | 35.9 | 30.4 | 17.6  | 194  | 78.1  | 15.5 | 12.3 | 482  | 18.0 | 43.0 | 0.590 | 0.195 | 153  | 4.05  | 9.79 |
| SO255-DR52-1       | 25.3 | 36.9 | 261  | 303  | 43.6 | 170   | 64.4 | 84.6  | 13.1 | 6.61 | 363  | 24.9 | 52.1 | 1.81  | 0.078 | 92.5 | 9.58  | 18.0 |
| SO255-DR62-1       | 6.92 | 42.8 | 458  | 37.1 | 40.8 | 16.8  | 300  | 133   | 17.2 | 9.42 | 186  | 23.3 | 49.5 | 0.560 | 0.550 | 174  | 3.44  | 10.2 |
| SO255-DR62-5       | 13.7 | 45.9 | 427  | 48.4 | 39.9 | 19.5  | 201  | 101   | 18.0 | 5.30 | 238  | 22.6 | 49.2 | 0.473 | 0.341 | 103  | 3.17  | 8.62 |
| SO255-DR62-6       | 9.33 | 51.5 | 527  | 8.30 | 49.4 | 20.0  | 144  | 121   | 18.4 | 7.01 | 225  | 29.0 | 67.8 | 0.618 | 0.353 | 172  | 3.78  | 10.6 |
| SO255-DR63-1       | 6.53 | 8.24 | 11.0 | 5.39 | 2.49 | 0.418 | 3.66 | 68.2  | 16.5 | 17.3 | 241  | 34.7 | 132  | 1.15  | 0.493 | 288  | 7.12  | 18.8 |
| SO255-DR63-2       | 11.1 | 9.09 | 12.8 | 5.49 | 3.01 | 1.03  | 3.83 | 75.4  | 17.1 | 22.2 | 252  | 36.0 | 138  | 1.21  | 0.732 | 306  | 7.26  | 19.3 |
| SO255-DR63-3       | 8.16 | 8.12 | 13.3 | 5.15 | 2.73 | 2.85  | 4.15 | 67.3  | 16.3 | 19.4 | 244  | 36.5 | 127  | 1.18  | 0.902 | 290  | 7.36  | 19.4 |
| SO255-DR63-4       | 6.86 | 8.18 | 10.7 | 5.03 | 2.53 | 0.432 | 4.63 | 61.9  | 15.7 | 17.0 | 240  | 35.6 | 121  | 1.13  | 0.633 | 284  | 7.12  | 18.7 |
| SO255-DR63-5       | 6.88 | 7.39 | 10.3 | 5.34 | 2.43 | 0.521 | 4.91 | 63.7  | 16.3 | 18.6 | 243  | 36.0 | 124  | 1.17  | 0.599 | 292  | 7.23  | 19.1 |
| SO255-DR125-1      | 5.88 | 42.7 | 376  | 21.9 | 40.0 | 16.3  | 162  | 86.4  | 18.0 | 6.85 | 229  | 20.3 | 44.1 | 0.527 | 0.420 | 133  | 3.64  | 8.95 |
| SO255-DR125-6      | 6.73 | 41.5 | 372  | 12.7 | 37.4 | 10.8  | 148  | 87.6  | 17.1 | 7.92 | 209  | 22.6 | 44.8 | 0.573 | 0.493 | 147  | 4.07  | 10.1 |
| SO255-DR128-1      | 5.57 | 46.9 | 296  | 221  | 36.3 | 61.5  | 95.6 | 62.1  | 13.3 | 2.86 | 114  | 14.4 | 22.4 | 0.141 | 0.408 | 61.0 | 0.666 | 2.33 |
| SO255-DR128-5      | 6.50 | 49.0 | 292  | 175  | 40.0 | 48.9  | 102  | 66.7  | 13.3 | 2.12 | 110  | 14.8 | 23.5 | 0.138 | 0.327 | 40.0 | 0.660 | 2.35 |
| SO255-DR129-1      | 2.48 | 61.6 | 208  | 1558 | 54.8 | 234   | 31.7 | 43.0  | 6.3  | 1.01 | 46.4 | 8.06 | 10.8 | 0.077 | 0.127 | 19.6 | 0.306 | 1.11 |
| SO255-DR129-10     | 6.37 | 32.6 | 301  | 9.26 | 40.2 | 27.8  | 166  | 100   | 15.2 | 14.9 | 241  | 16.2 | 42.3 | 0.735 | 0.658 | 353  | 5.67  | 13.2 |
| SO255-DR129-12     | 5.39 | 42.7 | 305  | 65.2 | 36.1 | 36.3  | 149  | 74.1  | 14.4 | 4.31 | 173  | 16.7 | 30.8 | 0.396 | 0.397 | 89.0 | 2.09  | 5.54 |
| SO255-DR129-20     | 9.02 | 51.2 | 306  | 89.7 | 40.7 | 43.2  | 113  | 68.3  | 13.7 | 1.43 | 125  | 16.2 | 29.1 | 0.197 | 0.124 | 58.6 | 0.902 | 3.14 |
| SO255-DR130-1      | 5.59 | 54.3 | 400  | 26.0 | 41.2 | 13.3  | 249  | 113   | 15.9 | 3.92 | 111  | 20.3 | 33.4 | 0.185 | 0.574 | 76.8 | 1.05  | 3.61 |
| SO255-DR130-2      | 5.67 | 47.7 | 389  | 11.5 | 41.5 | 13.1  | 235  | 110   | 15.7 | 4.18 | 118  | 18.8 | 31.5 | 0.187 | 0.590 | 78.8 | 1.06  | 3.64 |
| SO255-DR130-3      | 5.68 | 48.0 | 403  | 13.6 | 43.2 | 14.4  | 240  | 114   | 15.4 | 4.02 | 112  | 18.5 | 30.9 | 0.187 | 0.602 | 79.4 | 1.07  | 3.72 |
| SO255-DR130-4      | 5.79 | 46.5 | 389  | 11.7 | 40.4 | 12.2  | 245  | 115   | 15.6 | 4.47 | 116  | 19.9 | 33.4 | 0.199 | 0.638 | 87.8 | 1.15  | 3.90 |
| SO255-DR131-1      | 5.56 | 47.5 | 326  | 66.6 | 36.7 | 34.4  | 120  | 72.7  | 14.0 | 4.81 | 134  | 15.8 | 27.1 | 0.230 | 0.418 | 97.0 | 1.22  | 3.56 |
| SO255-DR131-2      | 4.78 | 45.9 | 297  | 69.5 | 36.8 | 37.6  | 110  | 71.7  | 13.9 | 4.61 | 127  | 15.1 | 25.5 | 0.236 | 0.395 | 88.3 | 1.13  | 3.34 |
| SO255-DR131-3      | 5.71 | 49.6 | 321  | 72.7 | 35.8 | 33.5  | 105  | 71.6  | 14.0 | 4.98 | 135  | 15.3 | 25.3 | 0.237 | 0.408 | 89.4 | 1.15  | 3.38 |
| SO255-DR132-2      | 4.67 | 48.4 | 337  | 52.0 | 44.1 | 28.7  | 161  | 101   | 15.0 | 7.09 | 187  | 18.9 | 38.1 | 0.440 | 0.361 | 152  | 2.75  | 7.25 |
| SO255-DR132-4      | 5.98 | 37.8 | 382  | 7.07 | 34.7 | 10.4  | 222  | 113   | 16.8 | 7.16 | 175  | 21.5 | 47.9 | 0.545 | 0.439 | 160  | 2.73  | 7.77 |
| SO255-DR132-5      | 4.19 | 44.6 | 324  | 43.1 | 44.7 | 35.7  | 147  | 90.4  | 14.5 | 6.77 | 179  | 16.0 | 31.6 | 0.413 | 0.350 | 141  | 2.45  | 6.60 |
| SO255-DR133-1      | 5.43 | 41.0 | 340  | 28.3 | 35.8 | 25.9  | 90.5 | 75.0  | 15.7 | 3.43 | 150  | 16.6 | 29.4 | 0.188 | 0.338 | 74.6 | 1.10  | 3.58 |
| SO255-DR133-4      | 4.50 | 45.9 | 285  | 41.3 | 41.9 | 151   | 92.2 | 63.0  | 12.8 | 2.26 | 110  | 13.9 | 22.2 | 0.124 | 0.275 | 53.6 | 0.693 | 2.44 |
| SO255-DR134-1      | 8.01 | 42.6 | 342  | 31.0 | 35.2 | 34.9  | 93.1 | 75.7  | 15.5 | 3.09 | 195  | 15.6 | 29.1 | 0.215 | 0.280 | 85.3 | 1.17  | 3.41 |
| SO255-DR134-6      | 6.51 | 40.5 | 318  | 59.2 | 35.8 | 46.5  | 56.3 | 73.5  | 15.6 | 1.71 | 192  | 16.9 | 26.3 | 0.236 | 0.117 | 78.7 | 1.37  | 3.71 |
| SO255-DR135-1      | 7.05 | 50.9 | 427  | 7.62 | 34.2 | 12.9  | 200  | 116   | 14.9 | 4.80 | 139  | 25.9 | 45.7 | 0.254 | 0.392 | 132  | 1.42  | 4.75 |
| SO255-DR135-4      | 6.90 | 48.6 | 421  | 9.40 | 35.8 | 13.6  | 201  | 116   | 15.9 | 4.91 | 122  | 23.8 | 41.6 | 0.243 | 0.417 | 121  | 1.33  | 4.37 |
| SO255-DR135-6      | 6.71 | 49.9 | 547  | 11.9 | 36.7 | 8.63  | 267  | 137   | 17.3 | 4.61 | 191  | 24.4 | 43.2 | 0.308 | 0.414 | 143  | 1.95  | 5.96 |
| SO255-DR135-7      | 6.13 | 49.6 | 501  | 21.0 | 38.9 | 9.84  | 238  | 127   | 16.8 | 3.84 | 191  | 20.8 | 35.0 | 0.231 | 0.392 | 126  | 1.61  | 4.94 |
| SO255-DR135-10     | 5.92 | 52.8 | 508  | 27.4 | 38.2 | 9.48  | 236  | 126   | 16.5 | 3.72 | 189  | 20.7 | 34.4 | 0.230 | 0.385 | 123  | 1.57  | 4.76 |
| SO255-DR176-1      | 6.65 | 43.7 | 377  | 8.76 | 45.3 | 14.7  | 195  | 127   | 15.5 | 11.9 | 272  | 18.7 | 47.9 | 0.854 | 0.369 | 343  | 4.38  | 10.4 |
| SO255-DR176-2      | 7.21 | 43.1 | 392  | 5.92 | 44.0 | 13.1  | 210  | 125   | 15.9 | 13.3 | 280  | 19.7 | 52.0 | 0.887 | 0.418 | 363  | 4.69  | 11.1 |
| SO255-DR176-2      | 6.75 | 46.2 | 350  | 53.3 | 46.2 | 31.0  | 137  | 78.1  | 15.4 | 9.70 | 314  | 17.2 | 44.5 | 0.713 | 0.335 | 304  | 3.84  | 9.13 |
| SO255-DR176-3      | 6.81 | 48.5 | 361  | 31.1 | 44.8 | 22.8  | 129  | 75.9  | 14.9 | 7.83 | 275  | 16.7 | 40.5 | 0.576 | 0.338 | 244  | 2.79  | 7.11 |
| SO255-DR176-4      | 6.59 | 43.0 | 322  | 26.8 | 44.1 | 25.4  | 139  | 77.2  | 15.3 | 9.39 | 299  | 16.7 | 44.1 | 0.711 | 0.322 | 292  | 3.74  | 8.89 |
| SO255-DR30-2       | 7.88 | 29.5 | 267  | 16.3 | 22.7 | 7.9   | 80.4 | 89.4  | 16.8 | 15.5 | 275  | 38.5 | 74.0 | 1.34  | 0.492 | 386  | 5.31  | 12.7 |
| SO255-DR30-4       | 8.79 | 33.9 | 288  | 30.6 | 30.1 | 13.1  | 72.2 | 84.6  | 16.3 | 15.5 | 245  | 24.9 | 81.3 | 1.20  | 0.525 | 455  | 5.51  | 12.6 |
| SO255-DR31-1       | 11.8 | 27.9 | 337  | 33.1 | 29.2 | 16.1  | 150  | 80.3  | 17.7 | 10.4 | 343  | 19.2 | 53.1 | 0.903 | 0.337 | 347  | 3.66  | 8.87 |
| SO255-DR31-3       | 6.29 | 43.6 | 378  | 149  | 37.3 | 32.9  | 131  | 82.1  | 16.6 | 9.94 | 321  | 18.5 | 54.3 | 0.815 | 0.319 | 320  | 3.35  | 7.95 |
| SO255-DR35-2       | 17.2 | 37.4 | 369  | 13.9 | 28.3 | 10.0  | 145  | 102   | 21.9 | 7.96 | 449  | 32.0 | 90.0 | 1.40  | 0.407 | 481  | 11.7  | 25.2 |
| SO255-DR35-4       | 17.5 | 37.9 | 385  | 14.1 | 28.3 | 10.7  | 105  | 106   | 22.6 | 12.4 | 443  | 31.0 | 91.7 | 1.43  | 0.340 | 641  | 11.7  | 25.2 |
| SO255-DR35-6       | 17.2 | 36.6 | 367  | 14.1 | 28.5 | 11.0  | 143  | 104   | 21.7 | 13.0 | 440  | 30.5 | 90.4 | 1.40  | 0.348 | 630  | 11.5  | 24.9 |
| SO255-DR35-9       | 30.4 | 16.3 | 62.5 | 4.79 | 7.16 | 1.75  | 18.5 | 80.7  | 17.3 | 37.3 | 257  | 37.9 | 150  | 2.35  | 0.627 | 920  | 14.9  | 33.5 |
| SO255-DR54-2       | 18.8 | 47.6 | 544  | 19.5 | 31.1 | 13.4  | 98.4 | 98.6  | 23.6 | 15.5 | 392  | 52.2 | 70.9 | 0.95  | 0.096 | 381  | 15.4  | 27.8 |
| SO255-DR54-3Clast1 | 23.0 | 46.8 | 499  | 14.4 | 34.8 | 16.0  | 155  | 104   | 17.7 | 12.7 | 339  | 38.8 | 70.1 | 0.668 | 0.275 | 114  | 6.94  | 15.8 |
| SO255-DR54-3Clast2 | 23.1 | 48.7 | 510  | 15.4 | 35.7 | 16.6  | 156  | 106   | 17.9 | 12.8 | 325  | 39.8 | 71.2 | 0.671 | 0.273 | 112  | 6.89  | 15.0 |
| SO255-DR126-1      | 6.36 | 44.0 | 356  | 6.85 | 34.7 | 4.75  | 65.9 | 105   | 18.0 | 7.29 | 239  | 27.8 | 61.0 | 0.445 | 0.224 | 217  | 3.29  | 8.78 |
| SO255-DR126-4      | 7.16 | 46.3 | 408  | 5.13 | 32.8 | 16.6  | 84.0 | 125   | 21.8 | 15.1 | 296  | 36.4 | 73.1 | 0.551 | 0.501 | 327  | 4.41  | 11.2 |
| SO255-DR136-1      | 14.1 | 48.9 | 530  | 5.65 | 37.7 | 7.17  | 40.3 | 124   | 18.9 | 23.0 | 432  | 31.1 | 100  | 1.46  | 0.863 | 604  | 11.9  | 26.1 |
| SO255-DR136-3      | 16.8 | 40.5 | 252  | 5.77 | 31.2 | 3.83  | 85.7 | 152   | 19.5 | 26.5 | 446  | 43.5 | 139  | 2.10  | 0.891 | 831  | 18.1  | 39.9 |
| SO255-DR137-1      | 10.7 | 33.3 | 331  | 16.4 | 26.5 | 13.4  | 125  | 110   | 16.2 | 55.1 | 181  | 21.8 | 86.0 | 1.19  | 0.346 | 825  | 8.55  | 17.8 |
| SO255-DR137-2      | 8.98 | 34.0 | 300  | 15.9 | 22.1 | 10.9  | 137  | 122   | 15.7 | 60.6 | 181  | 16.8 | 92.3 | 1.25  | 0.285 | 1084 | 7.79  | 16.4 |
| SO255-DR138-1      | 14.6 | 59.5 | 383  | 261  | 47.5 | 62.0  | 54.9 | 87.9  | 16.5 | 5.25 | 469  | 30.4 | 51.4 | 0.652 | 0.123 | 180  | 11.3  | 16.4 |
| SO255-DR138-9      | 38.9 | 52.4 | 345  | 47.8 | 25.0 | 20.2  | 129  | 57.9  | 13.6 | 10.0 | 286  | 35.2 | 36.5 | 0.487 | 0.119 | 410  | 8.89  | 18.7 |
| SO255-DR139-2      | 15.5 | 38.3 | 294  | 18.5 | 35.0 | 17.5  | 104  | 68.5  | 16.1 | 9.78 | 350  | 12.6 | 25.0 | 0.284 | 1.07  | 110  | 1.47  | 3.98 |
| SO255-DR139-8      | 19.7 | 40.1 | 337  | 28.3 | 33.4 | 38.6  | 92.7 | 105.1 | 17.9 | 5.34 | 1011 | 33.4 | 95.8 | 1.71  | 0.050 | 775  | 1     |      |

| Sample                 | Li   | Sc   | V    | Cr   | Co   | Ni   | Cu   | Zn   | Ga   | Rb   | Sr   | Y    | Zr   | Nb    | Cs    | Ba   | La   | Ce   |
|------------------------|------|------|------|------|------|------|------|------|------|------|------|------|------|-------|-------|------|------|------|
|                        | µg/g  | µg/g  | µg/g | µg/g | µg/g |
| SO255-DR76-2           | 12.8 | 22.8 | 283  | 45.5 | 22.9 | 25.9 | 67.2 | 65.3 | 18.7 | 16.4 | 757  | 20.7 | 89.2 | 5.26  | 0.184 | 236  | 14.9 | 32.9 |
| SO255-DR76-3           |      |      |      |      |      |      |      |      |      |      |      |      |      |       |       |      |      |      |
| SO255-DR78-1A          | 19.4 | 40.1 | 370  | 8.13 | 41.3 | 25.5 | 48.1 | 108  | 17.6 | 9.67 | 346  | 21.9 | 54.7 | 1.2   | 0.186 | 90.1 | 6.66 | 16.9 |
| SO255-DR78-1BClastI    | 15.8 | 34.5 | 296  | 7.69 | 37.2 | 17.5 | 38.2 | 78.7 | 14.5 | 25.2 | 311  | 24.6 | 47.1 | 0.859 | 0.289 | 115  | 6.77 | 14.9 |
| SO255-DR78-1BClastII   |      |      |      |      |      |      |      |      |      |      |      |      |      |       |       |      |      |      |
| TAN1611-DR017A         | 14.0 | 32.0 | 286  | 166  | 35.0 | 79.1 | 55.6 | 86.5 | 17.2 | 5.92 | 706  | 26.5 | 101  | 8.88  | 0.060 | 339  | 17.7 | 36.8 |
| TAN1611-DR017B         |      |      |      |      |      |      |      |      |      |      |      |      |      |       |       |      |      |      |
| P49127*                | 20.2 | 30.8 | 336  | 15.5 | 50.4 | 40.6 | 136  | 93.0 | 18.2 | 1.97 | 1347 | 27.6 | 90.3 | 2.60  | 0.066 | 467  | 18.4 | 36.9 |
| SO255-DR4-1            | 8.13 | 29.0 | 245  | 8.19 | 16.0 | 4.9  | 28.8 | 89.2 | 15.2 | 10.4 | 319  | 19.4 | 19.5 | 1.33  | 0.109 | 281  | 6.57 | 14.9 |
| SO255-DR4-3            |      |      |      |      |      |      |      |      |      |      |      |      |      |       |       |      |      |      |
| SO255-DR4-12           | 7.20 | 29.1 | 225  | 13.7 | 23.6 | 8.59 | 103  | 56.2 | 17.2 | 29.1 | 314  | 19.3 | 71.5 | 1.62  | 0.34  | 566  | 7.31 | 14.8 |
| SO255-DR4-13           | 5.66 | 20.1 | 138  | 7.48 | 13.4 | 5.78 | 36.6 | 41.9 | 15.1 | 49.3 | 268  | 12.8 | 104  | 1.82  | 0.21  | 756  | 6.12 | 13.6 |
| SO255-DR5-1            | 12.0 | 25.9 | 222  | 8.27 | 22.9 | 7.15 | 110  | 74.2 | 18.4 | 5.56 | 478  | 19.6 | 59.9 | 1.56  | 0.056 | 605  | 6.85 | 15.4 |
| SO255-DR5-4            |      |      |      |      |      |      |      |      |      |      |      |      |      |       |       |      |      |      |
| SO255-DR5-6            |      |      |      |      |      |      |      |      |      |      |      |      |      |       |       |      |      |      |
| SO255-DR85-1           | 7.46 | 20.7 | 192  | 15.6 | 17.9 | 10.8 | 21.1 | 73.4 | 18.1 | 13.8 | 540  | 25.8 | 162  | 5.08  | 0.067 | 754  | 24.2 | 51.9 |
| SO255-DR85-2           | 15.1 | 6.74 | 35.8 | 5.20 | 4.4  | 90.9 | 11.9 | 57.7 | 18.2 | 31.2 | 402  | 33.8 | 223  | 6.45  | 0.087 | 985  | 30.1 | 60.2 |
| SO255-DR89-1           | 32.2 | 35.0 | 282  | 126  | 43.0 | 92.4 | 41.1 | 89.8 | 15.4 | 4.50 | 472  | 22.4 | 77.5 | 3.55  | 0.270 | 129  | 10.8 | 23.6 |
| SO255-DR89-3           |      |      |      |      |      |      |      |      |      |      |      |      |      |       |       |      |      |      |
| SO255-DR89-4           |      |      |      |      |      |      |      |      |      |      |      |      |      |       |       |      |      |      |
| SO255-DR93-1           | 19.2 | 9.58 | 46.4 | 6.30 | 4.8  | 10.7 | 25.3 | 35.2 | 17.4 | 96.6 | 171  | 39.7 | 179  | 13.6  | 0.307 | 1288 | 35.5 | 70.1 |
| SO255-DR93-2           |      |      |      |      |      |      |      |      |      |      |      |      |      |       |       |      |      |      |
| SO255-DR97-1           | 29.0 | 14.4 | 115  | 5.27 | 12.5 | 31.3 | 33.7 | 88.1 | 21.8 | 71.9 | 311  | 48.3 | 296  | 5.54  | 0.334 | 920  | 34.8 | 72.3 |
| SO255-DR97-4           | 16.9 | 23.6 | 233  | 5.44 | 24.2 | 6.3  | 81.7 | 101  | 17.9 | 45.4 | 412  | 39.3 | 190  | 3.45  | 0.949 | 572  | 26.7 | 56.3 |
| SO255-DR97-8           |      |      |      |      |      |      |      |      |      |      |      |      |      |       |       |      |      |      |
| SO255-DR98-1           | 38.2 | 20.3 | 216  | 24.5 | 19.6 | 34.5 | 35.0 | 74.1 | 17.5 | 28.7 | 415  | 28.4 | 133  | 2.02  | 0.180 | 509  | 17.0 | 35.5 |
| SO255-DR98-2           | 24.0 | 38.4 | 361  | 52.2 | 33.6 | 20.7 | 77.1 | 92.7 | 17.3 | 5.57 | 430  | 20.7 | 67.9 | 1.14  | 0.084 | 302  | 10.6 | 23.4 |
| SO255-DR98-3           |      |      |      |      |      |      |      |      |      |      |      |      |      |       |       |      |      |      |
| SO255-DR99-1           | 66.0 | 28.9 | 279  | 34.2 | 35.3 | 66.6 | 42.7 | 123  | 17.6 | 155  | 131  | 33.5 | 112  | 1.87  | 1.825 | 678  | 16.0 | 31.4 |
| SO255-DR99-2           |      |      |      |      |      |      |      |      |      |      |      |      |      |       |       |      |      |      |
| SO255-DR99-3           | 44.1 | 25.4 | 221  | 20.4 | 27.5 | 39.1 | 32.2 | 114  | 14.3 | 73.1 | 294  | 43.7 | 124  | 2.11  | 0.361 | 835  | 22.9 | 43.2 |
| SO255-DR101-1A         | 21.7 | 24.3 | 260  | 9.71 | 25.9 | 8.58 | 37.6 | 66.9 | 17.6 | 39.2 | 315  | 21.6 | 93.6 | 1.58  | 0.768 | 1029 | 13.0 | 28.1 |
| SO255-DR101-1B         | 27.4 | 32.9 | 339  | 9.90 | 33.1 | 10.4 | 67.4 | 144  | 19.9 | 15.2 | 302  | 21.2 | 81.4 | 1.16  | 0.472 | 446  | 7.88 | 18.3 |
| SO255-DR101-2          | 31.0 | 28.8 | 275  | 27.3 | 33.2 | 22.7 | 61.7 | 91.4 | 18.0 | 16.6 | 330  | 22.0 | 109  | 1.81  | 0.247 | 525  | 13.8 | 29.4 |
| SO255-DR155-1          | 14.2 | 36.2 | 414  | 9.00 | 31.8 | 10.7 | 118  | 104  | 15.7 | 15.7 | 257  | 25.2 | 68.5 | 0.874 | 0.056 | 261  | 6.10 | 14.7 |
| SO255-DR156-1AClastI   |      |      |      |      |      |      |      |      |      |      |      |      |      |       |       |      |      |      |
| SO255-DR156-1AClastII  | 23.9 | 13.4 | 80.2 | 12.7 | 10.1 | 24.9 | 30.9 | 33.5 | 6.2  | 38.9 | 193  | 22.3 | 63.9 | 1.08  | 0.096 | 1039 | 6.58 | 18.0 |
| SO255-DR156-1AClastIII | 13.5 | 17.0 | 109  | 7.20 | 7.03 | 4.57 | 47.7 | 75.9 | 9.9  | 49.6 | 223  | 53.8 | 135  | 1.65  | 0.108 | 1375 | 14.2 | 31.4 |
| SO255-DR156-1BClastI   | 18.6 | 17.0 | 119  | 12.4 | 12.8 | 9.24 | 57.4 | 88.3 | 14.9 | 66.2 | 267  | 26.9 | 92.4 | 1.34  | 0.131 | 1470 | 7.96 | 21.3 |
| SO255-DR156-1BClastII  |      |      |      |      |      |      |      |      |      |      |      |      |      |       |       |      |      |      |
| SO255-DR158-1          | 14.3 | 28.7 | 246  | 5.13 | 22.4 | 3.25 | 46.1 | 120  | 17.3 | 18.4 | 252  | 34.6 | 105  | 1.48  | 0.114 | 1404 | 8.67 | 20.7 |
| SO255-DR158-2          | 7.68 | 21.0 | 158  | 4.91 | 20.4 | 2.93 | 19.2 | 118  | 14.9 | 4.30 | 283  | 31.6 | 69.2 | 1.58  | 0.056 | 660  | 11.6 | 26.2 |
| SO255-DR159-1          | 37.0 | 36.3 | 234  | 107  | 33.4 | 46.7 | 136  | 87.3 | 14.3 | 7.46 | 318  | 10.2 | 30.7 | 0.407 | 0.180 | 226  | 3.00 | 6.66 |
| TAN1611-DR05A          | 13.5 | 25.4 | 267  | 6.25 | 23.7 | 10.3 | 34.0 | 77.7 | 18.4 | 7.38 | 344  | 21.3 | 64   | 1.02  | 0.107 | 418  | 4.90 | 11.8 |
| TAN1611-DR06A          | 11.5 | 29.3 | 177  | 5.51 | 20.9 | 27.2 | 67.2 | 116  | 20.4 | 24.1 | 372  | 47.7 | 144  | 2.03  | 0.161 | 1081 | 14.3 | 32.8 |
| TAN1611-DR06B          |      |      |      |      |      |      |      |      |      |      |      |      |      |       |       |      |      |      |
| TAN1611-DR06C          |      |      |      |      |      |      |      |      |      |      |      |      |      |       |       |      |      |      |
| TAN1611-DR08B          | 15.3 | 14.3 | 45.4 | 5.07 | 6.5  | 7.99 | 37.7 | 221  | 23.5 | 68.1 | 246  | 52.3 | 157  | 2.05  | 0.198 | 4050 | 14.7 | 31.7 |
| SO255-DR2-1            | 9.70 | 7.94 | 10.2 | 4.72 | 9.65 | 141  | 44.3 | 94.2 | 21.7 | 13.3 | 259  | 31.6 | 138  | 13.1  | 0.090 | 361  | 19.7 | 46.8 |
| SO255-DR2-3            |      |      |      |      |      |      |      |      |      |      |      |      |      |       |       |      |      |      |
| SO255-DR2-4            | 11.9 | 11.4 | 82.6 | 5.42 | 7.82 | 58.8 | 69.0 | 127  | 22.2 | 24.7 | 407  | 59.9 | 226  | 28.6  | 0.379 | 328  | 30.9 | 54.2 |
| SO255-DR3-1ClastI      | 24.7 | 26.7 | 177  | 240  | 28.5 | 112  | 52.6 | 127  | 15.4 | 11.0 | 571  | 92.6 | 195  | 31.7  | 0.082 | 229  | 41.5 | 46.6 |
| SO255-DR3-1ClastII     | 24.1 | 35.3 | 204  | 236  | 20.4 | 90.1 | 50.3 | 119  | 16.6 | 7.97 | 622  | 165  | 196  | 32.7  | 0.072 | 243  | 64.5 | 50.0 |
| SO255-DR3-2            | 17.2 | 28.5 | 275  | 245  | 25.9 | 88.6 | 110  | 151  | 16.7 | 10.0 | 591  | 143  | 203  | 35.8  | 0.067 | 267  | 63.5 | 51.6 |
| TAN1611-DR01A          | 9.30 | 29.7 | 251  | 320  | 54.0 | 216  | 61.7 | 96.1 | 17.7 | 14.5 | 1064 | 21.9 | 166  | 51.6  | 0.175 | 263  | 27.5 | 54.1 |
| TAN1611-DR01B          |      |      |      |      |      |      |      |      |      |      |      |      |      |       |       |      |      |      |
| TAN1611-DR01C          | 8.54 | 32.0 | 268  | 364  | 58.0 | 242  | 53.5 | 93.9 | 16.3 | 6.87 | 1601 | 23.0 | 167  | 52.3  | 0.080 | 241  | 28.2 | 55.9 |
| TAN1611-DR02A          | 7.24 | 20.8 | 168  | 369  | 48.4 | 235  | 53.9 | 94.2 | 18.3 | 11.2 | 448  | 18.2 | 127  | 29.2  | 0.162 | 173  | 15.4 | 29.9 |
| TAN1611-DR02B          |      |      |      |      |      |      |      |      |      |      |      |      |      |       |       |      |      |      |
| TAN1611-DR02C          |      |      |      |      |      |      |      |      |      |      |      |      |      |       |       |      |      |      |

| Sample             | Pr    | Nd   | Sm    | Eu    | Gd   | Tb    | Dy   | Ho    | Er    | Tm    | Yb    | Lu    | Hf    | Ta    | Pb    | Th    | U     |
|--------------------|-------|------|-------|-------|------|-------|------|-------|-------|-------|-------|-------|-------|-------|-------|-------|-------|
|                    | µg/g  | µg/g | µg/g  | µg/g  | µg/g | µg/g  | µg/g | µg/g  | µg/g  | µg/g  | µg/g  | µg/g  | µg/g  | µg/g  | µg/g  | µg/g  | µg/g  |
| SO255-DR32-1       | 2.17  | 10.5 | 2.82  | 0.950 | 3.06 | 0.501 | 3.16 | 0.661 | 1.98  | 0.283 | 1.92  | 0.300 | 1.47  | 0.058 | 2.89  | 1.11  | 0.800 |
| SO255-DR32-8       | 1.97  | 9.52 | 2.66  | 0.931 | 3.01 | 0.504 | 3.23 | 0.682 | 1.83  | 0.294 | 1.97  | 0.310 | 1.32  | 0.055 | 3.49  | 1.13  | 0.789 |
| SO255-DR47-1       | 1.98  | 9.77 | 2.83  | 0.986 | 3.39 | 0.590 | 3.92 | 0.832 | 2.49  | 0.362 | 2.43  | 0.377 | 1.51  | 0.050 | 3.42  | 0.889 | 0.679 |
| SO255-DR47-2       | 2.61  | 12.5 | 3.36  | 1.15  | 3.87 | 0.656 | 4.29 | 0.908 | 2.71  | 0.393 | 2.60  | 0.407 | 1.81  | 0.064 | 4.10  | 1.36  | 0.400 |
| SO255-DR47-3       | 1.53  | 7.59 | 2.29  | 0.825 | 2.71 | 0.468 | 3.10 | 0.654 | 1.76  | 0.283 | 1.89  | 0.295 | 1.21  | 0.045 | 2.35  | 0.728 | 0.266 |
| SO255-DR52-1       | 2.97  | 14.0 | 3.39  | 1.21  | 3.67 | 0.578 | 3.69 | 0.784 | 2.07  | 0.323 | 2.06  | 0.327 | 1.39  | 0.121 | 2.32  | 0.866 | 2.40  |
| SO255-DR62-1       | 1.67  | 8.94 | 2.76  | 0.973 | 3.48 | 0.597 | 4.11 | 0.853 | 2.52  | 0.378 | 2.62  | 0.385 | 1.66  | 0.041 | 3.06  | 0.392 | 0.178 |
| SO255-DR62-5       | 1.44  | 7.89 | 2.52  | 0.902 | 3.12 | 0.559 | 3.69 | 0.797 | 2.40  | 0.344 | 2.32  | 0.368 | 1.43  | 0.040 | 2.30  | 0.334 | 2.26  |
| SO255-DR62-6       | 1.77  | 9.59 | 3.12  | 1.08  | 3.89 | 0.692 | 4.64 | 0.997 | 3.02  | 0.439 | 2.93  | 0.461 | 1.88  | 0.048 | 2.72  | 0.426 | 0.257 |
| SO255-DR63-1       | 2.91  | 14.5 | 4.11  | 1.18  | 4.64 | 0.828 | 5.55 | 1.18  | 3.61  | 0.542 | 3.73  | 0.598 | 3.26  | 0.088 | 2.61  | 0.621 | 0.265 |
| SO255-DR63-2       | 3.02  | 14.9 | 4.21  | 1.21  | 4.80 | 0.852 | 5.64 | 1.21  | 3.68  | 0.552 | 3.77  | 0.600 | 3.36  | 0.091 | 2.79  | 0.645 | 0.274 |
| SO255-DR63-3       | 3.03  | 14.9 | 4.22  | 1.22  | 4.86 | 0.845 | 5.65 | 1.21  | 3.37  | 0.558 | 3.84  | 0.618 | 3.23  | 0.096 | 2.78  | 0.654 | 0.275 |
| SO255-DR63-4       | 2.96  | 14.4 | 4.11  | 1.19  | 4.72 | 0.832 | 5.55 | 1.19  | 3.32  | 0.552 | 3.81  | 0.617 | 3.09  | 0.093 | 2.61  | 0.622 | 0.265 |
| SO255-DR63-5       | 2.97  | 14.7 | 4.18  | 1.20  | 4.78 | 0.846 | 5.60 | 1.20  | 3.33  | 0.558 | 3.82  | 0.616 | 3.23  | 0.094 | 2.72  | 0.650 | 0.271 |
| SO255-DR125-1      | 1.39  | 7.14 | 2.26  | 0.829 | 2.77 | 0.494 | 3.33 | 0.721 | 2.18  | 0.316 | 2.12  | 0.336 | 1.20  | 0.039 | 2.04  | 0.658 | 3.41  |
| SO255-DR125-6      | 1.56  | 8.08 | 2.52  | 0.918 | 3.14 | 0.553 | 3.74 | 0.805 | 2.20  | 0.355 | 2.36  | 0.374 | 1.32  | 0.045 | 2.13  | 0.752 | 0.335 |
| SO255-DR128-1      | 0.460 | 2.88 | 1.22  | 0.506 | 1.78 | 0.343 | 2.39 | 0.528 | 1.53  | 0.236 | 1.59  | 0.252 | 0.711 | 0.020 | 1.37  | 0.054 | 0.035 |
| SO255-DR128-5      | 0.479 | 2.99 | 1.27  | 0.520 | 1.84 | 0.355 | 2.48 | 0.540 | 1.57  | 0.240 | 1.60  | 0.253 | 0.740 | 0.019 | 1.24  | 0.046 | 0.030 |
| SO255-DR129-1      | 0.232 | 1.50 | 0.673 | 0.275 | 1.00 | 0.196 | 1.36 | 0.304 | 0.862 | 0.133 | 0.881 | 0.141 | 0.363 | 0.014 | 0.722 | 0.032 | 0.024 |
| SO255-DR129-10     | 1.90  | 9.12 | 2.47  | 0.807 | 2.72 | 0.443 | 2.88 | 0.607 | 1.74  | 0.252 | 1.81  | 0.273 | 1.21  | 0.044 | 4.21  | 1.35  | 0.346 |
| SO255-DR129-12     | 0.892 | 4.82 | 1.65  | 0.637 | 2.17 | 0.401 | 2.77 | 0.605 | 1.76  | 0.273 | 1.83  | 0.290 | 0.889 | 0.037 | 1.80  | 0.334 | 0.104 |
| SO255-DR129-20     | 0.595 | 3.61 | 1.44  | 0.587 | 2.04 | 0.388 | 2.69 | 0.592 | 1.70  | 0.261 | 1.75  | 0.275 | 0.880 | 0.025 | 1.70  | 0.076 | 0.581 |
| SO255-DR130-1      | 0.699 | 4.43 | 1.79  | 0.687 | 2.65 | 0.491 | 3.54 | 0.759 | 2.30  | 0.339 | 2.44  | 0.359 | 1.15  | 0.013 | 2.43  | 0.097 | 0.045 |
| SO255-DR130-2      | 0.715 | 4.14 | 1.69  | 0.667 | 2.45 | 0.461 | 3.21 | 0.687 | 2.11  | 0.302 | 2.20  | 0.322 | 1.04  | 0.013 | 2.40  | 0.090 | 0.050 |
| SO255-DR130-3      | 0.706 | 4.23 | 1.72  | 0.687 | 2.49 | 0.455 | 3.17 | 0.682 | 2.10  | 0.296 | 2.20  | 0.323 | 1.04  | 0.014 | 2.43  | 0.094 | 0.053 |
| SO255-DR130-4      | 0.742 | 4.43 | 1.77  | 0.707 | 2.56 | 0.492 | 3.41 | 0.747 | 2.22  | 0.314 | 2.32  | 0.339 | 1.10  | 0.014 | 2.59  | 0.109 | 0.057 |
| SO255-DR131-1      | 0.628 | 3.63 | 1.41  | 0.560 | 1.98 | 0.376 | 2.63 | 0.578 | 1.69  | 0.262 | 1.75  | 0.278 | 0.843 | 0.025 | 1.70  | 0.199 | 0.087 |
| SO255-DR131-2      | 0.594 | 3.41 | 1.33  | 0.531 | 1.88 | 0.359 | 2.51 | 0.550 | 1.59  | 0.246 | 1.67  | 0.261 | 0.788 | 0.026 | 1.55  | 0.176 | 0.077 |
| SO255-DR131-3      | 0.595 | 3.44 | 1.35  | 0.535 | 1.89 | 0.360 | 2.51 | 0.557 | 1.61  | 0.251 | 1.67  | 0.268 | 0.792 | 0.026 | 1.65  | 0.184 | 0.090 |
| SO255-DR132-2      | 1.21  | 6.59 | 2.16  | 0.846 | 3.01 | 0.512 | 3.51 | 0.755 | 2.23  | 0.324 | 2.21  | 0.331 | 1.26  | 0.033 | 2.14  | 0.418 | 0.134 |
| SO255-DR132-4      | 1.27  | 6.94 | 2.39  | 0.936 | 3.25 | 0.557 | 3.74 | 0.801 | 2.37  | 0.346 | 2.43  | 0.361 | 1.46  | 0.035 | 2.32  | 0.427 | 0.166 |
| SO255-DR132-5      | 1.06  | 5.59 | 1.86  | 0.715 | 2.37 | 0.417 | 2.83 | 0.595 | 1.78  | 0.254 | 1.79  | 0.256 | 0.972 | 0.027 | 1.88  | 0.363 | 0.123 |
| SO255-DR133-1      | 0.650 | 3.84 | 1.49  | 0.615 | 2.10 | 0.390 | 2.70 | 0.586 | 1.69  | 0.261 | 1.75  | 0.275 | 0.876 | 0.022 | 1.32  | 0.119 | 0.052 |
| SO255-DR133-4      | 0.468 | 2.85 | 1.19  | 0.489 | 1.73 | 0.323 | 2.29 | 0.498 | 1.43  | 0.223 | 1.48  | 0.236 | 0.703 | 0.019 | 1.01  | 0.060 | 0.032 |
| SO255-DR134-1      | 0.656 | 3.85 | 1.49  | 0.621 | 2.07 | 0.386 | 2.66 | 0.577 | 1.65  | 0.254 | 1.70  | 0.268 | 0.866 | 0.025 | 1.08  | 0.096 | 0.050 |
| SO255-DR134-6      | 0.723 | 4.19 | 1.57  | 0.654 | 2.16 | 0.398 | 2.74 | 0.598 | 1.72  | 0.260 | 1.73  | 0.271 | 0.826 | 0.028 | 0.88  | 0.119 | 0.050 |
| SO255-DR135-1      | 0.947 | 5.32 | 2.27  | 0.889 | 3.44 | 0.626 | 4.37 | 0.931 | 2.78  | 0.412 | 2.92  | 0.465 | 1.45  | 0.026 | 1.78  | 0.112 | 0.079 |
| SO255-DR135-4      | 0.856 | 5.29 | 2.00  | 0.778 | 3.01 | 0.560 | 4.08 | 0.873 | 2.77  | 0.384 | 2.83  | 0.409 | 1.43  | 0.021 | 1.72  | 0.089 | 0.057 |
| SO255-DR135-6      | 1.10  | 6.27 | 2.36  | 0.923 | 3.41 | 0.607 | 4.25 | 0.902 | 2.73  | 0.399 | 2.90  | 0.428 | 1.42  | 0.024 | 1.82  | 0.111 | 0.051 |
| SO255-DR135-7      | 0.921 | 5.35 | 1.99  | 0.829 | 2.87 | 0.514 | 3.67 | 0.780 | 2.34  | 0.339 | 2.47  | 0.358 | 1.18  | 0.016 | 1.64  | 0.080 | 0.038 |
| SO255-DR135-10     | 0.900 | 5.25 | 1.98  | 0.824 | 2.87 | 0.515 | 3.53 | 0.769 | 2.32  | 0.335 | 2.38  | 0.355 | 1.11  | 0.015 | 1.56  | 0.078 | 0.038 |
| SO255-DR176-1      | 1.62  | 8.10 | 2.41  | 0.844 | 2.95 | 0.491 | 3.27 | 0.679 | 2.02  | 0.301 | 2.06  | 0.304 | 1.38  | 0.048 | 3.53  | 0.721 | 0.258 |
| SO255-DR176-2      | 1.70  | 8.59 | 2.52  | 0.883 | 3.10 | 0.515 | 3.48 | 0.740 | 2.12  | 0.315 | 2.17  | 0.322 | 1.47  | 0.052 | 3.82  | 0.822 | 0.279 |
| SO255-DR176-2      | 1.41  | 7.02 | 2.14  | 0.755 | 2.54 | 0.437 | 2.89 | 0.609 | 1.72  | 0.260 | 1.72  | 0.270 | 1.21  | 0.052 | 2.50  | 0.628 | 0.247 |
| SO255-DR176-3      | 1.12  | 5.88 | 1.90  | 0.698 | 2.38 | 0.415 | 2.80 | 0.597 | 1.69  | 0.257 | 1.71  | 0.265 | 1.13  | 0.044 | 2.07  | 0.407 | 0.176 |
| SO255-DR176-4      | 1.36  | 6.89 | 2.10  | 0.738 | 2.47 | 0.427 | 2.83 | 0.598 | 1.69  | 0.257 | 1.70  | 0.266 | 1.21  | 0.052 | 2.50  | 0.622 | 0.235 |
| SO255-DR30-2       | 1.97  | 9.91 | 2.93  | 0.992 | 3.79 | 0.670 | 4.73 | 1.10  | 3.18  | 0.524 | 3.55  | 0.586 | 1.91  | 0.097 | 2.97  | 0.724 | 1.91  |
| SO255-DR30-4       | 1.92  | 9.43 | 2.74  | 0.895 | 3.25 | 0.570 | 3.84 | 0.836 | 2.57  | 0.375 | 2.57  | 0.413 | 1.98  | 0.081 | 2.94  | 0.855 | 1.51  |
| SO255-DR31-1       | 1.42  | 7.22 | 2.22  | 0.818 | 2.72 | 0.470 | 3.12 | 0.665 | 1.82  | 0.291 | 1.94  | 0.308 | 1.41  | 0.063 | 2.98  | 0.524 | 0.194 |
| SO255-DR31-3       | 1.27  | 6.60 | 2.05  | 0.746 | 2.51 | 0.437 | 2.92 | 0.621 | 1.87  | 0.273 | 1.83  | 0.286 | 1.35  | 0.053 | 2.61  | 0.469 | 0.188 |
| SO255-DR35-2       | 3.81  | 18.0 | 4.79  | 1.56  | 5.19 | 0.844 | 5.35 | 1.10  | 2.96  | 0.469 | 3.08  | 0.470 | 2.43  | 0.092 | 4.74  | 1.59  | 0.685 |
| SO255-DR35-4       | 3.88  | 18.5 | 4.87  | 1.59  | 5.29 | 0.853 | 5.34 | 1.11  | 2.91  | 0.452 | 2.91  | 0.440 | 2.49  | 0.094 | 4.30  | 1.62  | 0.711 |
| SO255-DR35-6       | 3.83  | 18.1 | 4.82  | 1.55  | 5.24 | 0.844 | 5.30 | 1.09  | 2.84  | 0.440 | 2.83  | 0.427 | 2.44  | 0.094 | 3.96  | 1.60  | 0.706 |
| SO255-DR35-9       | 4.77  | 22.0 | 5.63  | 1.58  | 6.01 | 0.980 | 6.23 | 1.30  | 3.52  | 0.570 | 3.83  | 0.600 | 4.01  | 0.152 | 5.76  | 2.93  | 0.906 |
| SO255-DR54-2       | 3.93  | 18.6 | 4.82  | 1.61  | 5.95 | 0.964 | 6.35 | 1.39  | 3.75  | 0.593 | 3.88  | 0.642 | 1.94  | 0.064 | 3.44  | 1.24  | 0.619 |
| SO255-DR54-3C1ast1 | 2.66  | 13.4 | 4.10  | 1.37  | 5.01 | 0.863 | 5.79 | 1.24  | 3.44  | 0.550 | 3.68  | 0.607 | 2.28  | 0.063 | 2.10  | 1.05  | 0.616 |
| SO255-DR54-3C1ast2 | 2.59  | 13.2 | 4.04  | 1.37  | 4.94 | 0.865 | 5.78 | 1.26  | 3.46  | 0.558 | 3.75  | 0.612 | 2.26  | 0.062 | 2.01  | 1.00  | 0.439 |
| SO255-DR126-1      | 1.46  | 8.11 | 2.75  | 1.03  | 3.60 | 0.661 | 4.50 | 0.980 | 2.94  | 0.436 | 2.91  | 0.460 | 1.73  | 0.037 | 1.74  | 0.480 | 0.160 |
| SO255-DR126-4      | 1.91  | 10.3 | 3.52  | 1.31  | 4.64 | 0.845 | 5.80 | 1.25  | 3.43  | 0.556 | 3.73  | 0.591 | 2.17  | 0.048 | 1.91  | 0.629 | 0.925 |
| SO255-DR136-1      | 3.79  | 18.0 | 4.62  | 1.50  | 4.98 | 0.819 | 5.20 | 1.07  | 3.16  | 0.456 | 3.03  | 0.472 | 2.39  | 0.089 | 6.03  | 1.73  | 0.577 |
| SO255-DR136-3      | 5.87  | 28.0 | 6.94  | 2.11  | 7.34 | 1.17  | 7.26 | 1.51  | 4.37  | 0.622 | 4.11  | 0.637 | 3.28  | 0.123 | 8.32  | 2.59  | 0.726 |
| SO255-DR137-1      | 2.71  | 12.7 | 3.15  | 0.909 | 3.26 | 0.539 | 3.45 | 0.738 | 2.25  | 0.324 | 2.19  | 0.342 | 2.04  | 0.071 | 3.81  | 1.47  | 0.724 |
| SO255-DR137-2      | 2.40  | 11.0 | 2.61  | 0.750 | 2.63 | 0.402 | 2.54 | 0.563 | 1.81  | 0.281 | 1.98  | 0.325 | 2.17  | 0.074 | 2.74  | 1.56  | 0.786 |
| SO255-DR138-1      | 3.30  | 15.9 | 3.84  | 1.27  | 4.11 | 0.612 | 3.79 | 0.806 | 2.38  | 0.328 | 2.13  | 0.345 | 1.32  | 0.040 | 3.19  | 1.07  | 0.206 |
| SO255-DR138-9      | 2.91  | 14.7 | 3.86  | 1.25  | 4.60 | 0.687 | 4.29 | 0.917 | 2.66  | 0.361 | 2.31  | 0.369 | 1.01  | 0.037 | 1.90  | 0.459 | 0.359 |
| SO255-DR139-2      | 0.696 | 3.89 | 1.39  | 0.589 | 1.79 | 0.321 | 2.15 | 0.460 | 1.32  | 0.200 | 1.31  | 0.208 | 0.730 | 0.027 | 1.38  | 0.120 | 0.114 |
| SO255-DR139-8      | 4.39  | 20.5 | 4.99  | 1.48  | 5.12 | 0.817 | 5.11 | 1.07  | 3.19  | 0.454 | 3.03  |       |       |       |       |       |       |

| Sample                 | Pr   | Nd   | Sm    | Eu    | Gd   | Tb    | Dy   | Ho    | Er   | Tm    | Yb   | Lu    | Hf    | Ta    | Pb   | Th    | U     |
|------------------------|------|------|-------|-------|------|-------|------|-------|------|-------|------|-------|-------|-------|------|-------|-------|
|                        | µg/g | µg/g | µg/g  | µg/g  | µg/g | µg/g  | µg/g | µg/g  | µg/g | µg/g  | µg/g | µg/g  | µg/g  | µg/g  | µg/g | µg/g  | µg/g  |
| SO255-DR76-2           | 4.45 | 19.8 | 4.35  | 1.43  | 4.06 | 0.612 | 3.68 | 0.748 | 2.08 | 0.306 | 2.03 | 0.312 | 1.98  | 0.337 | 1.84 | 1.77  | 0.539 |
| SO255-DR76-3           |      |      |       |       |      |       |      |       |      |       |      |       |       |       |      |       |       |
| SO255-DR78-1A          | 2.48 | 12.3 | 3.35  | 1.21  | 3.64 | 0.597 | 3.74 | 0.777 | 2.14 | 0.318 | 2.06 | 0.320 | 1.47  | 0.071 | 3.35 | 0.600 | 1.99  |
| SO255-DR78-1BClastI    | 2.38 | 11.8 | 3.17  | 1.14  | 3.50 | 0.571 | 3.69 | 0.791 | 2.23 | 0.331 | 2.15 | 0.340 | 1.22  | 0.061 | 1.69 | 0.510 | 1.50  |
| SO255-DR78-1BClastII   |      |      |       |       |      |       |      |       |      |       |      |       |       |       |      |       |       |
| TAN1611-DR017A         | 4.71 | 20.3 | 4.56  | 1.46  | 4.60 | 0.721 | 4.40 | 0.908 | 2.52 | 0.375 | 2.45 | 0.380 | 2.49  | 0.499 | 3.76 | 2.64  | 1.34  |
| TAN1611-DR017B         |      |      |       |       |      |       |      |       |      |       |      |       |       |       |      |       |       |
| P49127*                | 4.97 | 21.7 | 4.940 | 1.46  | 4.96 | 0.767 | 4.69 | 0.961 | 2.71 | 0.408 | 2.69 | 0.421 | 2.59  | 0.339 | 4.76 | 3.49  | 1.21  |
| SO255-DR4-1            | 2.16 | 10.4 | 2.85  | 0.872 | 3.08 | 0.519 | 3.30 | 0.692 | 1.94 | 0.290 | 1.91 | 0.287 | 0.702 | 0.093 | 4.99 | 1.34  | 0.325 |
| SO255-DR4-3            |      |      |       |       |      |       |      |       |      |       |      |       |       |       |      |       |       |
| SO255-DR4-12           | 2.24 | 10.2 | 2.85  | 0.923 | 3.08 | 0.507 | 3.34 | 0.717 | 2.04 | 0.332 | 2.17 | 0.338 | 2.23  | 0.112 | 1.44 | 1.36  | 0.43  |
| SO255-DR4-13           | 1.83 | 7.84 | 1.84  | 0.861 | 2.01 | 0.320 | 2.06 | 0.457 | 1.37 | 0.230 | 1.59 | 0.262 | 3.12  | 0.145 | 2.33 | 2.17  | 1.03  |
| SO255-DR5-1            | 2.16 | 10.2 | 2.74  | 0.964 | 3.06 | 0.513 | 3.30 | 0.697 | 1.99 | 0.301 | 2.04 | 0.322 | 1.71  | 0.106 | 2.87 | 1.28  | 0.301 |
| SO255-DR5-4            |      |      |       |       |      |       |      |       |      |       |      |       |       |       |      |       |       |
| SO255-DR5-6            |      |      |       |       |      |       |      |       |      |       |      |       |       |       |      |       |       |
| SO255-DR85-1           | 6.18 | 25.6 | 5.47  | 1.73  | 5.16 | 0.798 | 4.76 | 0.968 | 2.69 | 0.407 | 2.74 | 0.427 | 3.69  | 0.343 | 3.47 | 5.36  | 0.859 |
| SO255-DR85-2           | 7.43 | 29.9 | 6.09  | 1.74  | 5.68 | 0.896 | 5.53 | 1.16  | 3.37 | 0.521 | 3.58 | 0.570 | 4.83  | 0.434 | 5.02 | 6.27  | 1.61  |
| SO255-DR89-1           | 3.20 | 14.4 | 3.46  | 1.22  | 3.69 | 0.596 | 3.76 | 0.791 | 2.21 | 0.333 | 2.20 | 0.350 | 1.74  | 0.217 | 3.54 | 1.27  | 1.56  |
| SO255-DR89-3           |      |      |       |       |      |       |      |       |      |       |      |       |       |       |      |       |       |
| SO255-DR89-4           |      |      |       |       |      |       |      |       |      |       |      |       |       |       |      |       |       |
| SO255-DR93-1           | 8.38 | 32.1 | 6.52  | 1.18  | 6.19 | 1.01  | 6.35 | 1.34  | 3.92 | 0.616 | 4.21 | 0.660 | 5.09  | 1.02  | 6.25 | 11.8  | 2.77  |
| SO255-DR93-2           |      |      |       |       |      |       |      |       |      |       |      |       |       |       |      |       |       |
| SO255-DR97-1           | 9.46 | 39.8 | 8.62  | 2.10  | 8.23 | 1.31  | 8.05 | 1.66  | 4.69 | 0.704 | 4.66 | 0.718 | 6.84  | 0.334 | 9.74 | 8.56  | 2.97  |
| SO255-DR97-4           | 7.53 | 32.6 | 7.23  | 1.91  | 7.03 | 1.10  | 6.73 | 1.38  | 3.89 | 0.578 | 3.85 | 0.603 | 4.45  | 0.211 | 6.57 | 5.48  | 1.50  |
| SO255-DR97-8           |      |      |       |       |      |       |      |       |      |       |      |       |       |       |      |       |       |
| SO255-DR98-1           | 4.71 | 20.4 | 4.64  | 1.46  | 4.69 | 0.757 | 4.76 | 0.995 | 2.82 | 0.429 | 2.88 | 0.451 | 3.07  | 0.135 | 4.20 | 2.70  | 0.959 |
| SO255-DR98-2           | 3.27 | 14.9 | 3.60  | 1.19  | 3.69 | 0.590 | 3.65 | 0.755 | 2.08 | 0.305 | 1.99 | 0.306 | 1.71  | 0.077 | 2.59 | 1.66  | 0.378 |
| SO255-DR98-3           |      |      |       |       |      |       |      |       |      |       |      |       |       |       |      |       |       |
| SO255-DR99-1           | 4.32 | 19.4 | 4.44  | 1.43  | 4.91 | 0.773 | 4.89 | 1.04  | 2.93 | 0.432 | 2.81 | 0.446 | 2.69  | 0.124 | 4.28 | 2.91  | 0.797 |
| SO255-DR99-2           |      |      |       |       |      |       |      |       |      |       |      |       |       |       |      |       |       |
| SO255-DR99-3           | 6.18 | 27.6 | 6.03  | 1.86  | 6.50 | 0.965 | 5.92 | 1.24  | 3.49 | 0.508 | 3.31 | 0.522 | 2.96  | 0.136 | 6.75 | 3.21  | 1.03  |
| SO255-DR101-1A         | 3.77 | 16.7 | 3.87  | 1.22  | 3.85 | 0.614 | 3.80 | 0.783 | 2.19 | 0.327 | 2.16 | 0.337 | 2.24  | 0.104 | 3.19 | 2.53  | 0.596 |
| SO255-DR101-1B         | 2.64 | 12.4 | 3.22  | 1.18  | 3.42 | 0.572 | 3.69 | 0.780 | 2.25 | 0.348 | 2.36 | 0.370 | 2.01  | 0.081 | 1.94 | 1.07  | 0.343 |
| SO255-DR101-2          | 3.92 | 17.3 | 3.98  | 1.25  | 3.93 | 0.633 | 3.93 | 0.805 | 2.29 | 0.350 | 2.35 | 0.367 | 2.58  | 0.120 | 3.33 | 2.98  | 0.803 |
| SO255-DR155-1          | 2.27 | 11.5 | 3.31  | 1.04  | 3.80 | 0.647 | 4.19 | 0.887 | 2.53 | 0.381 | 2.55 | 0.397 | 1.81  | 0.061 | 1.93 | 0.878 | 0.346 |
| SO255-DR156-1AClastI   |      |      |       |       |      |       |      |       |      |       |      |       |       |       |      |       |       |
| SO255-DR156-1AClastII  | 2.72 | 12.7 | 3.25  | 0.954 | 3.51 | 0.560 | 3.48 | 0.715 | 1.98 | 0.289 | 1.88 | 0.288 | 1.64  | 0.062 | 8.73 | 0.904 | 0.457 |
| SO255-DR156-1AClastIII | 4.67 | 22.4 | 6.17  | 1.53  | 6.98 | 1.21  | 8.11 | 1.78  | 5.30 | 0.835 | 5.66 | 0.896 | 3.40  | 0.107 | 7.84 | 1.34  | 0.728 |
| SO255-DR156-1BClastI   | 3.30 | 15.7 | 4.08  | 1.15  | 4.35 | 0.696 | 4.34 | 0.897 | 2.52 | 0.378 | 2.52 | 0.392 | 2.36  | 0.085 | 3.56 | 1.29  | 0.573 |
| SO255-DR156-1BClastII  |      |      |       |       |      |       |      |       |      |       |      |       |       |       |      |       |       |
| SO255-DR158-1          | 3.22 | 16.1 | 4.60  | 1.46  | 5.28 | 0.895 | 5.84 | 1.24  | 3.53 | 0.533 | 3.56 | 0.555 | 2.72  | 0.095 | 6.18 | 1.16  | 0.484 |
| SO255-DR158-2          | 3.84 | 18.1 | 4.69  | 1.39  | 5.06 | 0.850 | 5.39 | 1.12  | 3.12 | 0.468 | 3.06 | 0.448 | 2.22  | 0.104 | 3.29 | 1.57  | 0.563 |
| SO255-DR159-1          | 0.98 | 4.83 | 1.40  | 0.514 | 1.60 | 0.272 | 1.77 | 0.373 | 1.05 | 0.158 | 1.04 | 0.163 | 0.881 | 0.033 | 2.11 | 0.649 | 0.282 |
| TAN1611-DR05A          | 1.82 | 9.13 | 2.74  | 1.00  | 3.24 | 0.564 | 3.71 | 0.781 | 2.21 | 0.335 | 2.23 | 0.345 | 1.74  | 0.075 | 3.01 | 0.682 | 0.198 |
| TAN1611-DR06A          | 5.01 | 24.6 | 6.78  | 2.00  | 7.42 | 1.232 | 7.88 | 1.66  | 4.72 | 0.714 | 4.73 | 0.745 | 3.83  | 0.130 | 5.54 | 1.93  | 6.47  |
| TAN1611-DR06B          |      |      |       |       |      |       |      |       |      |       |      |       |       |       |      |       |       |
| TAN1611-DR06C          |      |      |       |       |      |       |      |       |      |       |      |       |       |       |      |       |       |
| TAN1611-DR08B          | 4.97 | 24.0 | 6.27  | 1.72  | 6.87 | 1.13  | 7.35 | 1.60  | 4.72 | 0.734 | 4.97 | 0.802 | 4.00  | 0.129 | 34.8 | 2.20  | 0.850 |
| SO255-DR2-1            | 5.39 | 23.6 | 5.38  | 2.37  | 5.52 | 0.888 | 5.43 | 1.11  | 3.02 | 0.432 | 2.71 | 0.412 | 4.38  | 1.20  | 7.05 | 3.06  | 0.367 |
| SO255-DR2-3            |      |      |       |       |      |       |      |       |      |       |      |       |       |       |      |       |       |
| SO255-DR2-4            | 8.26 | 36.2 | 8.16  | 2.82  | 8.80 | 1.41  | 8.94 | 1.88  | 5.30 | 0.780 | 5.08 | 0.787 | 4.64  | 1.60  | 7.62 | 2.99  | 0.973 |
| SO255-DR3-1ClastI      | 9.52 | 40.7 | 8.60  | 2.87  | 9.65 | 1.52  | 9.91 | 2.23  | 6.46 | 0.940 | 6.07 | 0.988 | 3.88  | 1.82  | 2.39 | 3.15  | 0.962 |
| SO255-DR3-1ClastII     | 13.4 | 57.8 | 11.9  | 4.00  | 14.3 | 2.25  | 15.3 | 3.61  | 10.8 | 1.59  | 10.5 | 1.76  | 3.98  | 1.89  | 2.41 | 3.32  | 1.42  |
| SO255-DR3-2            | 11.8 | 51.7 | 10.5  | 3.25  | 12.9 | 1.99  | 13.5 | 3.18  | 9.42 | 1.36  | 8.83 | 1.46  | 4.30  | 1.94  | 16.5 | 3.46  | 2.46  |
| TAN1611-DR01A          | 6.31 | 26.2 | 5.67  | 1.96  | 5.45 | 0.799 | 4.41 | 0.811 | 2.04 | 0.273 | 1.68 | 0.245 | 3.34  | 3.07  | 1.72 | 3.33  | 1.04  |
| TAN1611-DR01B          |      |      |       |       |      |       |      |       |      |       |      |       |       |       |      |       |       |
| TAN1611-DR01C          | 6.56 | 27.3 | 5.94  | 2.05  | 5.73 | 0.838 | 4.64 | 0.845 | 2.13 | 0.288 | 1.75 | 0.257 | 3.45  | 3.16  | 1.88 | 3.43  | 1.39  |
| TAN1611-DR02A          | 3.54 | 15.1 | 3.84  | 1.43  | 4.03 | 0.624 | 3.60 | 0.671 | 1.72 | 0.236 | 1.44 | 0.213 | 2.65  | 1.70  | 1.06 | 1.97  | 0.671 |
| TAN1611-DR02B          |      |      |       |       |      |       |      |       |      |       |      |       |       |       |      |       |       |
| TAN1611-DR02C          |      |      |       |       |      |       |      |       |      |       |      |       |       |       |      |       |       |



| Sample             | <sup>87</sup> Sr/ <sup>86</sup> Sr | 2SE      | <sup>143</sup> Nd/ <sup>144</sup> Nd | 2SE      | εNd** | <sup>176</sup> Hf/ <sup>177</sup> Hf | 2SE      | εHf** | <sup>206</sup> Pb/ <sup>204</sup> Pb | 2SE    | <sup>207</sup> Pb/ <sup>204</sup> Pb | 2SE    | <sup>208</sup> Pb/ <sup>204</sup> Pb | 2SE    |
|--------------------|------------------------------------|----------|--------------------------------------|----------|-------|--------------------------------------|----------|-------|--------------------------------------|--------|--------------------------------------|--------|--------------------------------------|--------|
| SO255-DR32-1       | 0.703946                           | 0.000005 | 0.512950                             | 0.000005 | 6.24  |                                      |          |       | 18.8022                              | 0.0009 | 15.6156                              | 0.0011 | 38.6497                              | 0.0035 |
| SO255-DR32-8       | 0.704031                           | 0.000005 | 0.512946                             | 0.000004 | 6.16  | 0.283144                             | 0.000005 | 12.69 | 18.8298                              | 0.0008 | 15.6204                              | 0.0009 | 38.6808                              | 0.0027 |
| SO255-DR47-1       | 0.703920                           | 0.000005 | 0.512982                             | 0.000005 | 6.87  | 0.283131                             | 0.000005 | 12.25 | 18.7260                              | 0.0013 | 15.5576                              | 0.0011 | 38.6507                              | 0.0031 |
| SO255-DR47-2       |                                    |          |                                      |          |       |                                      |          |       |                                      |        |                                      |        |                                      |        |
| SO255-DR47-3       |                                    |          |                                      |          |       |                                      |          |       |                                      |        |                                      |        |                                      |        |
| SO255-DR52-1       | 0.703752                           | 0.000005 | 0.512959                             | 0.000004 | 6.42  | 0.283114                             | 0.000006 | 11.65 | 18.7303                              | 0.0037 | 15.5579                              | 0.0032 | 38.5646                              | 0.0077 |
| SO255-DR62-1       | 0.703316                           | 0.000005 | 0.513051                             | 0.000005 | 8.21  |                                      |          |       | 18.6641                              | 0.0009 | 15.5736                              | 0.0009 | 38.3646                              | 0.0026 |
| SO255-DR62-5       |                                    |          |                                      |          |       |                                      |          |       |                                      |        |                                      |        |                                      |        |
| SO255-DR62-6       | 0.703315                           | 0.000005 | 0.513046                             | 0.000004 | 8.12  | 0.283140                             | 0.000004 | 12.54 | 18.6688                              | 0.0008 | 15.5740                              | 0.0007 | 38.3722                              | 0.0020 |
| SO255-DR63-1       | 0.703568                           | 0.000005 | 0.513039                             | 0.000004 | 7.98  | 0.283128                             | 0.000004 | 12.12 | 18.7317                              | 0.0007 | 15.5603                              | 0.0008 | 38.5017                              | 0.0026 |
| SO255-DR63-2       | 0.703590                           | 0.000005 | 0.513033                             | 0.000005 | 7.87  | 0.283129                             | 0.000004 | 12.17 | 18.7331                              | 0.0009 | 15.5612                              | 0.0010 | 38.5068                              | 0.0033 |
| SO255-DR63-3       | 0.703572                           | 0.000005 | 0.513040                             | 0.000005 | 8.00  |                                      |          |       | 18.7324                              | 0.0006 | 15.5608                              | 0.0006 | 38.5049                              | 0.0019 |
| SO255-DR63-4       |                                    |          |                                      |          |       |                                      |          |       |                                      |        |                                      |        |                                      |        |
| SO255-DR63-5       |                                    |          |                                      |          |       |                                      |          |       |                                      |        |                                      |        |                                      |        |
| SO255-DR125-1      |                                    |          |                                      |          |       |                                      |          |       |                                      |        |                                      |        |                                      |        |
| SO255-DR125-6      | 0.703750                           | 0.000005 | 0.512974                             | 0.000004 | 6.71  | 0.283130                             | 0.000005 | 12.18 | 18.7549                              | 0.0005 | 15.6051                              | 0.0004 | 38.5892                              | 0.0012 |
| SO255-DR128-1      | 0.704030                           | 0.000005 | 0.513062                             | 0.000005 | 8.42  | 0.283155                             | 0.000006 | 13.10 | 18.8002                              | 0.0006 | 15.6187                              | 0.0006 | 38.6910                              | 0.0019 |
| SO255-DR128-5      |                                    |          |                                      |          |       |                                      |          |       |                                      |        |                                      |        |                                      |        |
| SO255-DR129-1      | 0.704011                           | 0.000005 | 0.513074                             | 0.000005 | 8.67  |                                      |          |       | 18.8150                              | 0.0015 | 15.6235                              | 0.0013 | 38.6998                              | 0.0034 |
| SO255-DR129-10     | 0.703958                           | 0.000005 | 0.512957                             | 0.000005 | 6.38  |                                      |          |       | 18.7573                              | 0.0016 | 15.6067                              | 0.0014 | 38.6309                              | 0.0035 |
| SO255-DR129-12     | 0.703607                           | 0.000006 | 0.513040                             | 0.000005 | 7.99  |                                      |          |       | 18.7889                              | 0.0007 | 15.6159                              | 0.0007 | 38.6461                              | 0.0022 |
| SO255-DR129-20     |                                    |          |                                      |          |       |                                      |          |       |                                      |        |                                      |        |                                      |        |
| SO255-DR130-1      |                                    |          |                                      |          |       |                                      |          |       |                                      |        |                                      |        |                                      |        |
| SO255-DR130-2      |                                    |          |                                      |          |       |                                      |          |       |                                      |        |                                      |        |                                      |        |
| SO255-DR130-3      |                                    |          |                                      |          |       |                                      |          |       |                                      |        |                                      |        |                                      |        |
| SO255-DR130-4      | 0.703922                           | 0.000005 | 0.513067                             | 0.000003 | 8.52  |                                      |          |       | 18.8160                              | 0.0009 | 15.6238                              | 0.0010 | 38.6935                              | 0.0033 |
| SO255-DR131-1      | 0.704042                           | 0.000004 | 0.513041                             | 0.000005 | 8.01  | 0.283160                             | 0.000005 | 13.25 | 18.7883                              | 0.0009 | 15.6129                              | 0.0008 | 38.6399                              | 0.0022 |
| SO255-DR131-2      |                                    |          |                                      |          |       |                                      |          |       |                                      |        |                                      |        |                                      |        |
| SO255-DR131-3      |                                    |          |                                      |          |       |                                      |          |       |                                      |        |                                      |        |                                      |        |
| SO255-DR132-2      | 0.703687                           | 0.000005 | 0.513019                             | 0.000005 | 7.59  | 0.283147                             | 0.000005 | 12.81 | 18.7631                              | 0.0005 | 15.6080                              | 0.0005 | 38.6037                              | 0.0014 |
| SO255-DR132-4      |                                    |          |                                      |          |       |                                      |          |       |                                      |        |                                      |        |                                      |        |
| SO255-DR132-5      |                                    |          |                                      |          |       |                                      |          |       |                                      |        |                                      |        |                                      |        |
| SO255-DR133-1      | 0.703809                           | 0.000005 | 0.513064                             | 0.000002 | 8.47  |                                      |          |       | 18.8137                              | 0.0011 | 15.6179                              | 0.0009 | 38.6697                              | 0.0022 |
| SO255-DR133-4      |                                    |          |                                      |          |       |                                      |          |       |                                      |        |                                      |        |                                      |        |
| SO255-DR134-1      | 0.704007                           | 0.000005 | 0.513049                             | 0.000005 | 8.18  | 0.283170                             | 0.000004 | 13.61 | 18.7459                              | 0.0009 | 15.6014                              | 0.0010 | 38.6040                              | 0.0030 |
| SO255-DR134-6      |                                    |          |                                      |          |       |                                      |          |       |                                      |        |                                      |        |                                      |        |
| SO255-DR135-1      |                                    |          |                                      |          |       |                                      |          |       |                                      |        |                                      |        |                                      |        |
| SO255-DR135-4      |                                    |          |                                      |          |       |                                      |          |       |                                      |        |                                      |        |                                      |        |
| SO255-DR135-6      | 0.704036                           | 0.000005 | 0.513053                             | 0.000004 | 8.24  |                                      |          |       | 18.7295                              | 0.0009 | 15.5969                              | 0.0010 | 38.5789                              | 0.0030 |
| SO255-DR135-7      |                                    |          |                                      |          |       |                                      |          |       |                                      |        |                                      |        |                                      |        |
| SO255-DR135-10     |                                    |          |                                      |          |       |                                      |          |       |                                      |        |                                      |        |                                      |        |
| SO255-DR176-1      |                                    |          |                                      |          |       |                                      |          |       |                                      |        |                                      |        |                                      |        |
| SO255-DR176-2      | 0.704100                           | 0.000005 | 0.512972                             | 0.000005 | 6.67  | 0.283144                             | 0.000004 | 12.68 | 18.7566                              | 0.0011 | 15.5861                              | 0.0009 | 38.6175                              | 0.0022 |
| SO255-DR176-2      |                                    |          |                                      |          |       |                                      |          |       |                                      |        |                                      |        |                                      |        |
| SO255-DR176-3      |                                    |          |                                      |          |       |                                      |          |       |                                      |        |                                      |        |                                      |        |
| SO255-DR176-4      | 0.704097                           | 0.000005 | 0.512964                             | 0.000005 | 6.51  | 0.283142                             | 0.000005 | 12.61 | 18.7528                              | 0.0016 | 15.5840                              | 0.0014 | 38.6117                              | 0.0035 |
| SO255-DR30-2       | 0.703995                           | 0.000005 | 0.513009                             | 0.000005 | 7.40  | 0.283165                             | 0.000004 | 13.43 | 18.6773                              | 0.0009 | 15.5794                              | 0.0010 | 38.6033                              | 0.0033 |
| SO255-DR30-4       | 0.704056                           | 0.000005 | 0.512995                             | 0.000006 | 7.12  |                                      |          |       | 18.6829                              | 0.0014 | 15.5814                              | 0.0012 | 38.6074                              | 0.0037 |
| SO255-DR31-1       | 0.704119                           | 0.000005 | 0.513003                             | 0.000004 | 7.28  | 0.283146                             | 0.000006 | 12.77 | 18.6835                              | 0.0009 | 15.5793                              | 0.0009 | 38.6494                              | 0.0030 |
| SO255-DR31-3       | 0.704137                           | 0.000004 | 0.512995                             | 0.000005 | 7.12  |                                      |          |       | 18.6832                              | 0.0008 | 15.5784                              | 0.0009 | 38.6493                              | 0.0031 |
| SO255-DR35-2       |                                    |          |                                      |          |       |                                      |          |       |                                      |        |                                      |        |                                      |        |
| SO255-DR35-4       |                                    |          |                                      |          |       |                                      |          |       |                                      |        |                                      |        |                                      |        |
| SO255-DR35-6       | 0.704328                           | 0.000005 | 0.512946                             | 0.000004 | 6.17  | 0.283137                             | 0.000006 | 12.45 | 18.6370                              | 0.0005 | 15.5753                              | 0.0006 | 38.5539                              | 0.0020 |
| SO255-DR35-9       | 0.704389                           | 0.000005 | 0.512950                             | 0.000004 | 6.24  | 0.283141                             | 0.000003 | 12.58 | 18.6584                              | 0.0007 | 15.5828                              | 0.0007 | 38.5857                              | 0.0022 |
| SO255-DR54-2       | 0.704274                           | 0.000005 | 0.512934                             | 0.000005 | 5.93  | 0.283106                             | 0.000005 | 11.36 | 18.6212                              | 0.0009 | 15.5509                              | 0.0008 | 38.6866                              | 0.0023 |
| SO255-DR54-3Clast1 |                                    |          |                                      |          |       |                                      |          |       |                                      |        |                                      |        |                                      |        |
| SO255-DR54-3Clast2 | 0.704173                           | 0.000005 | 0.512964                             | 0.000005 | 6.51  | 0.283116                             | 0.000005 | 11.70 | 18.6089                              | 0.0017 | 15.5462                              | 0.0016 | 38.6639                              | 0.0046 |
| SO255-DR126-1      | 0.704066                           | 0.000005 | 0.513016                             | 0.000005 | 7.53  | 0.283140                             | 0.000005 | 12.56 | 18.6198                              | 0.0010 | 15.5682                              | 0.0008 | 38.5144                              | 0.0021 |
| SO255-DR126-4      |                                    |          |                                      |          |       |                                      |          |       |                                      |        |                                      |        |                                      |        |
| SO255-DR136-1      | 0.704274                           | 0.000005 | 0.512956                             | 0.000004 | 6.36  | 0.283124                             | 0.000006 | 12.00 | 18.4013                              | 0.0012 | 15.5486                              | 0.0014 | 38.6059                              | 0.0047 |
| SO255-DR136-3      |                                    |          |                                      |          |       |                                      |          |       |                                      |        |                                      |        |                                      |        |
| SO255-DR137-1      |                                    |          |                                      |          |       |                                      |          |       |                                      |        |                                      |        |                                      |        |
| SO255-DR137-2      | 0.704661                           | 0.000005 | 0.512944                             | 0.000006 | 6.13  | 0.283145                             | 0.000006 | 12.74 | 18.4977                              | 0.0008 | 15.5567                              | 0.0008 | 38.5904                              | 0.0026 |
| SO255-DR138-1      | 0.704363                           | 0.000004 | 0.512928                             | 0.000006 | 5.81  | 0.283133                             | 0.000004 | 12.29 | 18.4148                              | 0.0021 | 15.5398                              | 0.0018 | 38.5815                              | 0.0050 |
| SO255-DR138-9      | 0.704386                           | 0.000005 | 0.512965                             | 0.000005 | 6.54  | 0.283150                             | 0.000005 | 12.91 | 18.4947                              | 0.0012 | 15.5521                              | 0.0013 | 38.5886                              | 0.0041 |
| SO255-DR139-2      | 0.704306                           | 0.000005 | 0.513015                             | 0.000006 | 7.52  | 0.283156                             | 0.000005 | 13.10 | 18.4466                              | 0.0009 | 15.5429                              | 0.0010 | 38.5384                              | 0.0029 |
| SO255-DR139-8      | 0.704316                           | 0.000005 | 0.512951                             | 0.000005 | 6.26  | 0.283135                             | 0.000005 | 12.36 | 18.4758                              | 0.0013 | 15.5561                              | 0.0014 | 38.6111                              | 0.0041 |
| SO255-DR139-12     | 0.704218                           | 0.000005 | 0.512983                             | 0.000003 | 6.88  | 0.283140                             | 0.000004 | 12.56 | 18.4309                              | 0.0022 | 15.5465                              | 0.0019 | 38.5854                              | 0.0051 |
| SO255-DR139-15     |                                    |          |                                      |          |       |                                      |          |       |                                      |        |                                      |        |                                      |        |
| SO255-DR139-16     |                                    |          |                                      |          |       |                                      |          |       |                                      |        |                                      |        |                                      |        |
| SO255-DR139-17     |                                    |          |                                      |          |       |                                      |          |       |                                      |        |                                      |        |                                      |        |
| SO255-DR178-2      | 0.704278                           | 0.000004 | 0.512976                             | 0.000004 | 6.74  | 0.283156                             | 0.000004 | 13.13 | 18.6507                              | 0.0007 | 15.5693                              | 0.0007 | 38.5778                              | 0.0020 |
| SO255-DR178-3      |                                    |          |                                      |          |       |                                      |          |       |                                      |        |                                      |        |                                      |        |
| SO255-DR179-1      |                                    |          |                                      |          |       |                                      |          |       |                                      |        |                                      |        |                                      |        |
| SO255-DR179-5      | 0.704299                           | 0.000005 | 0.512949                             | 0.000005 | 6.23  | 0.283154                             | 0.000004 | 13.03 | 18.5541                              | 0.0006 | 15.5591                              | 0.0006 | 38.5191                              | 0.0016 |
| SO255-DR179-8      | 0.704270                           | 0.000005 | 0.512958                             | 0.000006 | 6.40  | 0.283149                             | 0.000005 | 12.87 | 18.6183                              | 0.0006 | 15.5641                              | 0.0006 | 38.5447                              | 0.0016 |
| SO255-DR179-12     | 0.704248                           | 0.000005 | 0.512979                             | 0.000006 | 6.81  | 0.283159                             | 0.000004 | 13.22 | 18.6522                              | 0.0017 | 15.5758                              | 0.0014 | 38.5858                              | 0.0038 |
| SO255-DR179-14     |                                    |          |                                      |          |       |                                      |          |       |                                      |        |                                      |        |                                      |        |
| SO255-DR179-15     | 0.704296                           | 0.000005 | 0.512956                             | 0.000005 | 6.36  | 0.283144                             | 0.000006 | 12.71 | 18.6318                              | 0.0006 | 15.5695                              | 0.0006 | 38.5652                              | 0.0020 |
| SO255-DR179-16     |                                    |          |                                      |          |       |                                      |          |       |                                      |        |                                      |        |                                      |        |
| SO255-DR179-17     | 0.704265                           | 0.000005 | 0.512972                             | 0.000005 | 6.67  | 0.283152                             | 0.000006 | 12.99 | 18.6229                              | 0.0017 | 15.5715                              | 0.0015 | 38.5661                              | 0.0038 |
| SO255-DR76-1       | 0.703567                           | 0.000005 | 0.512966                             | 0.000004 | 6.55  | 0.283088                             | 0.000005 | 10.71 | 18.7573                              | 0.0010 | 15.5634                              | 0.0009 | 38.5841                              | 0.0024 |

[illegible]



\*Mortimer, N., Gans, P. B., Palin, J. M., Meffre, S., Herzer, R. H., and Skinner, D. N. B., 2010, Location and migration of Miocene-Quaternary volcanic arcs in the SW Pacific region: *Journal of Volcanology and Geothermal Research*, v. 190, no. 1, p. 1-10.

\*\*Timm, C., de Ronde, C. E. J., Hoernle, K., Cousens, B., Wartho, J. A., Tontini, F. C., Wysoczanski, R., Hauff, F., and Handler, M., 2019, New Age and Geochemical Data from the Southern Colville and Kermadec and petrogenesis of the Proto-Kermadec (Vitiaz) Arc: *Gondwana Research*, v. 72, p. 169-193. Ridges, SW Pacific: Insights into the recent geological history

[data in blue from Timm et al 2019](#)

$\epsilon\text{Nd}$  and  $\epsilon\text{Hf}$  calculation uses the CHUR values of Bouvier, A., Vervoort, J. D., and Patchett, P. J., 2008, The Lu-Hf and Sm-Nd isotopic composition of CHUR: Constraints from unequilibrated chondrites and of terrestrial planets: *Earth and Planetary Science Letters*, v. 273, no. 1, p. 48-57. implications for the bulk composition
