# Supplementary material
Source: publisher figshare collection journal article supplement (https://gsapubs.figshare.com/articles/dataset/_/13377182)
Supplement: Supplementary file 3 [file 1]

Table S2 (replicates and reference materials)

# ICPMS Reference Materials

| Element | Unit | GeoReM* | Mean<br>n=9 | 1SD<br>(abs) | 1SD<br>(%) | Diff.<br>(%) | GeoReM* | Mean<br>n=9 | 1SD<br>(abs) | 1SD<br>(%) | Diff.<br>(%) |
|---------|------|---------|-------------|--------------|------------|--------------|---------|-------------|--------------|------------|--------------|
|         |      | BHVO-2  | BHVO-2      |              |            |              | AGV-2   | AGV-2       |              |            |              |
| Li      | µg/g | 4.5     | 4.65        | 0.05         | 1.1        | 3.4          | 10.8    | 10.7        | 0.20         | 1.8        | 1.2          |
| Sc      | µg/g | 31.83   | 31.4        | 0.78         | 2.5        | 1.3          | 13.11   | 13.5        | 0.39         | 2.9        | 2.8          |
| V       | µg/g | 318.2   | 322         | 9.39         | 2.9        | 1.3          | 118.5   | 124         | 5.53         | 4.4        | 5.0          |
| Cr      | µg/g | 287.2   | 277         | 11.72        | 4.2        | 3.6          | 16.22   | 19.3        | 0.96         | 4.9        | 19.3         |
| Co      | µg/g | 44.89   | 45.8        | 1.33         | 2.9        | 2.1          | 15.46   | 16.4        | 0.64         | 3.9        | 5.9          |
| Ni      | µg/g | 119.8   | 122         | 3.19         | 2.6        | 1.9          | 18.87   | 19.0        | 0.40         | 2.1        | 0.5          |
| Cu      | µg/g | 129.3   | 130         | 2.48         | 1.9        | 0.6          | 51.51   | 53.1        | 1.18         | 2.2        | 3.2          |
| Zn      | µg/g | 103.9   | 104         | 2.62         | 2.5        | 0.1          | 86.7    | 88.8        | 3.63         | 4.1        | 2.4          |
| Ga      | µg/g | 21.37   | 21.5        | 0.45         | 2.1        | 0.6          | 20.42   | 20.9        | 0.60         | 2.9        | 2.5          |
| Rb      | µg/g | 9.261   | 9.33        | 0.17         | 1.8        | 0.8          | 67.79   | 68.6        | 1.23         | 1.8        | 1.2          |
| Sr      | µg/g | 394.1   | 397         | 7.80         | 2.0        | 0.8          | 659.5   | 663         | 9.28         | 1.4        | 0.5          |
| Y       | µg/g | 25.91   | 26.3        | 0.64         | 2.4        | 1.5          | 19.14   | 19.9        | 0.45         | 2.2        | 3.8          |
| Zr      | µg/g | 171.2   | 177         | 6.25         | 3.5        | 3.4          | 232     | 239         | 7.94         | 3.3        | 3.0          |
| Nb      | µg/g | 18.1    | 18.1        | 0.21         | 1.1        | 0.0          | 14.12   | 13.8        | 0.21         | 1.6        | 2.5          |
| Cs      | µg/g | 0.0996  | 0.11        | 0.00         | 3.8        | 7.5          | 1.173   | 1.21        | 0.03         | 2.1        | 3.3          |
| Ba      | µg/g | 130.9   | 132         | 2.36         | 1.8        | 0.8          | 1134    | 1123        | 23.78        | 2.1        | 1.0          |
| La      | µg/g | 15.2    | 15.4        | 0.23         | 1.5        | 1.2          | 38.21   | 38.2        | 0.66         | 1.7        | 0.0          |
| Ce      | µg/g | 37.53   | 38.1        | 0.33         | 0.9        | 1.4          | 69.43   | 69.0        | 1.82         | 2.6        | 0.6          |
| Pr      | µg/g | 5.339   | 5.34        | 0.10         | 1.8        | 0.1          | 8.165   | 8.13        | 0.14         | 1.7        | 0.4          |
| Nd      | µg/g | 24.27   | 24.9        | 0.44         | 1.8        | 2.7          | 30.49   | 30.9        | 0.55         | 1.8        | 1.4          |
| Sm      | µg/g | 6.023   | 6.18        | 0.12         | 2.0        | 2.6          | 5.509   | 5.57        | 0.10         | 1.8        | 1.2          |
| Eu      | µg/g | 2.043   | 2.10        | 0.05         | 2.2        | 2.7          | 1.553   | 1.55        | 0.03         | 1.9        | 0.5          |
| Gd      | µg/g | 6.207   | 6.19        | 0.12         | 1.9        | 0.3          | 4.678   | 4.68        | 0.07         | 1.5        | 0.1          |
| Tb      | µg/g | 0.9392  | 0.94        | 0.02         | 1.9        | 0.1          | 0.651   | 0.644       | 0.01         | 1.3        | 1.0          |
| Dy      | µg/g | 5.28    | 5.34        | 0.11         | 2.0        | 1.1          | 3.549   | 3.50        | 0.05         | 1.5        | 1.3          |
| Ho      | µg/g | 0.9887  | 0.98        | 0.02         | 1.7        | 1.0          | 0.6818  | 0.660       | 0.01         | 1.7        | 3.2          |
| Er      | µg/g | 2.511   | 2.47        | 0.09         | 3.6        | 1.6          | 1.825   | 1.78        | 0.05         | 3.0        | 2.5          |
| Tm      | µg/g | 0.3349  | 0.33        | 0.01         | 1.9        | 2.2          | 0.262   | 0.252       | 0.00         | 1.7        | 4.1          |
| Yb      | µg/g | 1.994   | 1.98        | 0.04         | 1.8        | 0.5          | 1.653   | 1.63        | 0.02         | 1.5        | 1.5          |
| Lu      | µg/g | 0.2754  | 0.28        | 0.01         | 1.9        | 3.0          | 0.2507  | 0.254       | 0.00         | 1.5        | 1.2          |
| Hf      | µg/g | 4.47    | 4.26        | 0.15         | 3.6        | 4.6          | 5.137   | 4.93        | 0.13         | 2.6        | 4.0          |
| Ta      | µg/g | 1.154   | 1.14        | 0.02         | 2.1        | 0.9          | 0.865   | 0.820       | 0.02         | 2.3        | 5.2          |
| Pb      | µg/g | 1.653   | 1.69        | 0.09         | 5.4        | 2.5          | 13.14   | 13.7        | 0.41         | 3.0        | 4.4          |
| Th      | µg/g | 1.224   | 1.21        | 0.02         | 1.3        | 1.0          | 6.174   | 6.10        | 0.09         | 1.4        | 1.2          |
| U       | µg/g | 0.412   | 0.42        | 0.00         | 1.1        | 1.0          | 1.885   | 1.85        | 0.02         | 1.3        | 1.6          |

\*Jochum, K. P., Weis, U., Schwager, B., Stoll, B., Wilson, S. A., Haug, G. H., Andreae, M. O., and Enzweiler, J., 2016, Reference Values Following ISO Guidelines for Frequently Requested Rock Reference Materials: *Geostandards and Geoanalytical Research*, v. 40, no. 3, p. 333-350.

**ICPMS Sample Replicates**

| Element | Unit | SO255-<br>DR31-3 | SO255-<br>DR31-3 | Diff. (%) | SO255-<br>DR131-1 | SO255-<br>DR131-1 | Diff. (%) |
|---------|------|------------------|------------------|-----------|-------------------|-------------------|-----------|
|         |      | Dup 1            | Dup 2            |           | Dup 1             | Dup 2             |           |
| Li      | µg/g | 6.29             | 6.37             | 1.2       | 5.31              | 5.32              | 0.2       |
| Sc      | µg/g | 43.6             | 43.7             | 0.2       | 54.2              | 53.8              | 0.7       |
| V       | µg/g | 378              | 379              | 0.2       | 367               | 366               | 0.3       |
| Cr      | µg/g | 149              | 150              | 0.6       | 80.0              | 80.1              | 0.2       |
| Co      | µg/g | 37.3             | 37.4             | 0.3       | 42.4              | 41.5              | 2.2       |
| Ni      | µg/g | 32.9             | 33.3             | 1.4       | 37.6              | 36.7              | 2.4       |
| Cu      | µg/g | 131              | 132              | 0.4       | 130.6             | 128.6             | 1.6       |
| Zn      | µg/g | 82.1             | 83.0             | 1.1       | 82.9              | 82.5              | 0.5       |
| Ga      | µg/g | 16.6             | 16.7             | 0.8       | 15.1              | 15.3              | 1.1       |
| Rb      | µg/g | 9.94             | 9.93             | 0.1       | 5.08              | 5.02              | 1.2       |
| Sr      | µg/g | 321              | 325              | 1.5       | 137               | 136               | 0.8       |
| Y       | µg/g | 18.5             | 18.6             | 0.6       | 16.6              | 16.5              | 1.0       |
| Zr      | µg/g | 54.3             | 51.7             | 4.7       | 30.5              | 30.2              | 0.9       |
| Nb      | µg/g | 0.815            | 0.816            | 0.1       | 0.222             | 0.221             | 0.5       |
| Cs      | µg/g | 0.319            | 0.320            | 0.4       | 0.432             | 0.424             | 1.8       |
| Ba      | µg/g | 320              | 316              | 1.4       | 101               | 100               | 0.7       |
| La      | µg/g | 3.35             | 3.37             | 0.6       | 1.25              | 1.23              | 1.2       |
| Ce      | µg/g | 7.95             | 8.01             | 0.7       | 3.59              | 3.55              | 1.2       |
| Pr      | µg/g | 1.27             | 1.29             | 1.5       | 0.642             | 0.638             | 0.5       |
| Nd      | µg/g | 6.60             | 6.61             | 0.1       | 3.70              | 3.72              | 0.4       |
| Sm      | µg/g | 2.05             | 2.06             | 0.8       | 1.45              | 1.42              | 2.0       |
| Eu      | µg/g | 0.746            | 0.753            | 0.8       | 0.569             | 0.557             | 2.1       |
| Gd      | µg/g | 2.51             | 2.51             | 0.1       | 2.03              | 1.99              | 2.2       |
| Tb      | µg/g | 0.437            | 0.441            | 0.8       | 0.386             | 0.380             | 1.5       |
| Dy      | µg/g | 2.92             | 2.90             | 0.6       | 2.68              | 2.63              | 1.9       |
| Ho      | µg/g | 0.621            | 0.629            | 1.3       | 0.591             | 0.579             | 2.0       |
| Er      | µg/g | 1.87             | 1.88             | 0.5       | 1.79              | 1.76              | 1.7       |
| Tm      | µg/g | 0.273            | 0.270            | 1.0       | 0.264             | 0.259             | 2.1       |
| Yb      | µg/g | 1.83             | 1.82             | 0.7       | 1.77              | 1.74              | 1.8       |
| Lu      | µg/g | 0.286            | 0.290            | 1.4       | 0.278             | 0.275             | 1.1       |
| Hf      | µg/g | 1.35             | 1.30             | 3.3       | 0.886             | 0.878             | 0.9       |
| Ta      | µg/g | 0.053            | 0.053            | 0.6       | 0.022             | 0.021             | 5.9       |
| Pb      | µg/g | 2.61             | 2.62             | 0.6       | 1.77              | 1.73              | 2.2       |
| Th      | µg/g | 0.469            | 0.472            | 0.7       | 0.190             | 0.188             | 1.1       |
| U       | µg/g | 0.188            | 0.187            | 0.7       | 0.083             | 0.085             | 2.9       |

## Sr-Nd-Pb-Hf Reference Materials

| Ratio                             | RM    | this study* | 2SD (abs) | N | Fourny et al.<br>(2016) | 2SD (abs) | Todd et al.<br>(2015) | 2SD (abs) | RM       | this study | 2SD (abs) | N   | Instrument   | Lab    |
|-----------------------------------|-------|-------------|-----------|---|-------------------------|-----------|-----------------------|-----------|----------|------------|-----------|-----|--------------|--------|
| $^{87}\text{Sr}/^{86}\text{Sr}$   | BCR-2 | 0.705004    | 0.000013  | 8 | 0.705006                | 0.000007  |                       |           | NBS987   | 0.710250   | 0.000008  | 101 | Triton Plus  | GEOMAR |
| $^{143}\text{Nd}/^{144}\text{Nd}$ | BCR-2 | 0.512637    | 0.000011  | 8 | 0.512643                | 0.000014  |                       |           | La Jolla | 0.511850   | 0.000006  | 95  | Triton Plus  | GEOMAR |
| $^{206}\text{Pb}/^{204}\text{Pb}$ | BCR-2 | 18.8019     | 0.0012    | 8 | 18.7988                 | 0.0027    | 18.8004               | 0.0038    | NBS981   | 16.9408    | 0.0018    | 173 | Triton Plus  | GEOMAR |
| $^{207}\text{Pb}/^{204}\text{Pb}$ | BCR-2 | 15.6232     | 0.0012    | 8 | 15.6235                 | 0.0028    | 15.6238               | 0.0016    | NBS981   | 15.4975    | 0.0018    | 173 | Triton Plus  | GEOMAR |
| $^{208}\text{Pb}/^{204}\text{Pb}$ | BCR-2 | 38.8227     | 0.0046    | 8 | 38.8281                 | 0.0099    | 38.8287               | 0.0049    | NBS981   | 36.7207    | 0.0048    | 173 | Triton Plus  | GEOMAR |
| $^{207}\text{Pb}/^{206}\text{Pb}$ | BCR-2 | 0.830939    | 0.000050  | 8 |                         |           |                       |           | NBS981   | 0.914803   | 0.000050  | 173 | Triton Plus  | GEOMAR |
| $^{208}\text{Pb}/^{206}\text{Pb}$ | BCR-2 | 2.064830    | 0.000167  | 8 |                         |           |                       |           | NBS981   | 2.167584   | 0.000099  | 173 | Triton Plus  | GEOMAR |
| $^{176}\text{Hf}/^{177}\text{Hf}$ | BCR-2 | 0.282870    | 0.000005  | 3 | 0.282869                | 0.000014  |                       |           | SPEX     | 0.282170   | 0.000006  | 110 | Neptune Plus | GEOMAR |
| $^{176}\text{Hf}/^{177}\text{Hf}$ | AGV-2 | 0.282979    | 0.000006  | 2 | 0.282973                | 0.000010  |                       |           |          |            |           |     |              |        |

\* leached in 2 M HCl at 70°C for one hour followed by triple rinsing in 18.2 MΩ H<sub>2</sub>O

Fourny, A., Weis, D., and Scoates, J. S., 2016, Comprehensive Pb-Sr-Nd-Hf isotopic, trace element, and mineralogical characterization of mafic to ultramafic rock reference materials: Geochemistry, Geophysics, Geosystems, v. 17, no. 3, p. 739-773.

Todd, E., Stracke, A., and Scherer, E. E., 2015, Effects of simple acid leaching of crushed and powdered geological materials on high-precision Pb isotope analyses: Geochemistry, Geophysics, Geosystems, v. 16, no. 7, p. 2276-2302.

# Sr-Nd-Pb-Hf Sample Replicates

| Sample               | Dissolution | <sup>87</sup> Sr/ <sup>86</sup> Sr | 2SE      | <sup>143</sup> Nd/ <sup>144</sup> Nd | 2SE      | <sup>206</sup> Pb/ <sup>204</sup> Pb | 2SE    | <sup>207</sup> Pb/ <sup>204</sup> Pb | 2SE    | <sup>208</sup> Pb/ <sup>204</sup> Pb | 2SE    | <sup>207</sup> Pb/ <sup>204</sup> Pb | 2SE      | <sup>208</sup> Pb/ <sup>206</sup> Pb | 2SE      | <sup>176</sup> Hf/ <sup>177</sup> Hf | 2SE      |
|----------------------|-------------|------------------------------------|----------|--------------------------------------|----------|--------------------------------------|--------|--------------------------------------|--------|--------------------------------------|--------|--------------------------------------|----------|--------------------------------------|----------|--------------------------------------|----------|
| SO255-DR30-2         | #1          | 0.703995                           | 0.000005 | 0.513009                             | 0.000005 | 18.6773                              | 0.0009 | 15.5794                              | 0.0010 | 38.6033                              | 0.0033 | 0.834136                             | 0.000016 | 2.066855                             | 0.000082 |                                      |          |
| SO255-DR30-2         | #2          | 0.704004                           | 0.000005 | 0.513001                             | 0.000006 | 18.6759                              | 0.0007 | 15.5774                              | 0.0008 | 38.5964                              | 0.0022 | 0.834093                             | 0.000011 | 2.066646                             | 0.000055 |                                      |          |
| SO255-DR35-9         | #1          | 0.704389                           | 0.000005 | 0.512950                             | 0.000004 | 18.6584                              | 0.0007 | 15.5828                              | 0.0007 | 38.5857                              | 0.0022 | 0.835164                             | 0.000013 | 2.068003                             | 0.000057 |                                      |          |
| SO255-DR35-9         | #2          | 0.704410                           | 0.000005 | 0.512943                             | 0.000004 | 18.6583                              | 0.0011 | 15.5824                              | 0.0013 | 38.5857                              | 0.0043 | 0.835146                             | 0.000022 | 2.068014                             | 0.000117 |                                      |          |
| SO255-DR62-6         | #1          |                                    |          |                                      |          |                                      |        |                                      |        |                                      |        |                                      |          |                                      |          | 0.283132                             | 0.000006 |
| SO255-DR62-6         | #2          |                                    |          |                                      |          |                                      |        |                                      |        |                                      |        |                                      |          |                                      |          | 0.283140                             | 0.000004 |
| SO255-DR78-1A        | #1          | 0.703559                           | 0.000006 | 0.512966                             | 0.000004 | 18.7392                              | 0.0040 | 15.5696                              | 0.0035 | 38.5483                              | 0.0084 | 0.830858                             | 0.000039 | 2.057098                             | 0.000080 |                                      |          |
| SO255-DR78-1A        | #2          | 0.703543                           | 0.000005 | 0.512960                             | 0.000004 | 18.7256                              | 0.0018 | 15.5753                              | 0.0016 | 38.5517                              | 0.0044 | 0.831763                             | 0.000012 | 2.058766                             | 0.000052 |                                      |          |
| SO255-DR136-1        | #1          | 0.704367                           | 0.000006 | 0.512955                             | 0.000006 | 18.3844                              | 0.0010 | 15.5279                              | 0.0011 | 38.5351                              | 0.0034 | 0.844626                             | 0.000017 | 2.096076                             | 0.000083 |                                      |          |
| SO255-DR136-1        | #2*         | 0.704274                           | 0.000005 | 0.512956                             | 0.000004 | 18.4013                              | 0.0012 | 15.5486                              | 0.0014 | 38.6059                              | 0.0047 | 0.844971                             | 0.000023 | 2.098000                             | 0.000120 |                                      |          |
| SO255-DR139-8        | #1          | 0.706023                           | 0.000005 | 0.512951                             | 0.000005 | 18.4758                              | 0.0013 | 15.5561                              | 0.0014 | 38.6111                              | 0.0041 | 0.841974                             | 0.000020 | 2.089823                             | 0.000097 |                                      |          |
| SO255-DR139-8        | #2*         | 0.704316                           | 0.000005 | n.a                                  |          | n.a                                  |        | n.a                                  |        | n.a                                  |        | n.a                                  |          | n.a                                  |          |                                      |          |
| SO255-DR156-1BClastl | #1          | 0.704640                           | 0.000005 | 0.512964                             | 0.000005 | 18.4270                              | 0.0007 | 15.5464                              | 0.0006 | 38.5895                              | 0.0017 | 0.843678                             | 0.000010 | 2.094189                             | 0.000033 |                                      |          |
| SO255-DR156-1BClastl | #2*         | 0.704645                           | 0.000006 | 0.512964                             | 0.000005 | 18.4231                              | 0.0006 | 15.5450                              | 0.0006 | 38.5850                              | 0.0015 | 0.843781                             | 0.000008 | 2.094386                             | 0.000030 |                                      |          |
| TAN1611-DR01A        | #1          | 0.705011                           | 0.000005 | 0.513003                             | 0.000005 | 19.1064                              | 0.0067 | 15.5789                              | 0.0055 | 38.6740                              | 0.0135 | 0.815374                             | 0.000048 | 2.024137                             | 0.000097 |                                      |          |
| TAN1611-DR01A        | #2          | 0.704334                           | 0.000006 | 0.513000                             | 0.000005 | 19.0963                              | 0.0009 | 15.5688                              | 0.0008 | 38.6467                              | 0.0023 | 0.815279                             | 0.000010 | 2.023780                             | 0.000044 |                                      |          |
| TAN1611-DR01A        | #3*         | 0.702869                           | 0.000005 | n.a                                  |          | n.a                                  |        | n.a                                  |        | n.a                                  |        | n.a                                  |          | n.a                                  |          |                                      |          |
| TAN1611-DR02A        | #1          | 0.702818                           | 0.000005 | 0.513030                             | 0.000004 | 19.0218                              | 0.0055 | 15.5610                              | 0.0045 | 38.5512                              | 0.0110 | 0.818064                             | 0.000036 | 2.026688                             | 0.000057 |                                      |          |
| TAN1611-DR02A        | #2          | 0.702825                           | 0.000006 | 0.513020                             | 0.000005 | 19.0226                              | 0.0010 | 15.5609                              | 0.0011 | 38.5544                              | 0.0035 | 0.818019                             | 0.000018 | 2.026763                             | 0.000087 |                                      |          |

\*leached in 6M

HCl @ 150C for

12 hrs
